# Supplementary material for: SMYD3-Mediated H2A.Z.1 Methylation Promotes Cell Cycle and Cancer Proliferation
Source: Oxford University Press journal article supplement (doi:10.1158/0008-5472.can-16-0500), 2016-08-28
Supplement: 00085472can160500-sup-162464_1_supp_3568150_j9qfhj.xlsx [file 00085472can160500-sup-162464_1_supp_3568150_j9qfhj.xlsx]

## Sheet: SMYD3
Supplementary Table S1. List of methylated histone proteins identified from in vitro HMT assay on calf thymus extracts followed by LC-MS/MS analysis (related to Figure 1A).
Column header	Column Title Description for Protein
Accession	Displays by default the unique identifier assigned to the protein by the FASTA database used to generate the report.
Descriptions	Provides the name of the protein exclusive of the identifier that appears in the Accession column.
Score	Mascot score of all peptides for the best associated tandem-MS spectrum.
Coverage [%]	Displays by default the percentage of the protein sequence covered by identified peptides.
# Proteins	Displays the number of identified proteins in the protein group of a master protein.
# Unique Peptides	Displays the number of peptide sequences unique to a protein group.
# Peptides	Displays the number of distinct peptide sequences in the protein group.
# PSM	Displays the total number of identified peptide sequences (peptide spectrum matches) for the protein, including those redundantly identified.
Area	Displays the average area of the three unique peptides with the largest peak area.
# AAs	Shows by default the sequence length of the protein.
MW [kDa]	Displays the calculated molecular weight of the protein.
calc. pI	Displays the theoretically calculated isoelectric point, which is the pH at which a particular molecule carries no net electrical charge.
Column header	Column Title Description for Peptide
Sequence	Displays the sequence of amino acids that compose the peptide.
# PSMs	Displays the total number of identified peptide sequences (peptide spectrum matches) for the protein, including those redundantly identified.
# Proteins	Displays the number of proteins in which this peptide is found.
Protein Group	Displays the nuimbers of all master proteins that were combined into a group.
Protein Group Accessions	Displays the unique identifiers (accessions) of all master proteins from all protein groups that include this peptide sequence.
Modifications	Displays the static and dynamic modifications identified in the peptide.
ΔCn	Displays the normalized score difference between the currently selected PSM and the highest-scoring PSM for that spectrum.
Area	Displays the area of the peak for the isotopic cluster for the peptide.
IonScore	Refer to the Mascot documentation from Matrix Science.
Exp Value	Displays the expectation value, which is a measure of the number of matches with scores equal to or better than the score values that are expected to occur only by chance.
Charge	Displays the charge state of the peptide.
MH+ [Da]	Displays the protonated monoisotopic mass of the peptides, in daltons.
ΔM [ppm]	Displays the difference between the theoretical mass of the peptide and the experimental mass of the precursor ion.
RT [min]	Displays the retention time when the peptide was observed, in minutes.
# Missed Cleavages	Displays the number of cleavage sites in a peptide sequence that a cleavage reagent (enzyme) did not cleave.
Accession	Description	Score	Coverage	# Proteins	# Unique Peptides	# Peptides	# PSMs	Area	# AAs	MW [kDa]	calc. pI
P62808	Histone H2B type 1 OS=Bos taurus PE=1 SV=2 - [H2B1_BOVIN]	23873.3	97.62	2	2	37	1484	2.38186e+10	126	13.8976	10.3159
	Sequence	# PSMs	# Proteins	# Protein Groups	Protein Group Accessions	Modifications	ΔCn	Area	IonScore	Exp Value	Charge	MH+ [Da]	ΔM [ppm]	RT [min]	# Missed Cleavages
	AmGIMNSFVNDIFER	66	2	2	P62808;Q2M2T1	M2(Oxida)	0	1.89148e+09	114.02	5.41712e-10	2	1759.81	-0.307986	47.3263	0
	HAVSEGTKAVTKYTSSK	33	2	1	P62808		0	3.18473e+08	109.05	3.23823e-09	2	1793.94	-1.15941	19.378	2
	AmGImNSFVNDIFER	222	2	2	P62808;Q2M2T1	M2(Oxida); M5(Oxida)	0	17068261376	106.53	3.01814e-09	2	1775.8	-3.01198	62.0744	0
	AMGIMNSFVNDIFER	28	2	2	P62808;Q2M2T1		0	6.70788e+08	106.4	3.38934e-09	2	1743.82	0.905569	50.0905	0
	LLLPGELAkHAVSEGTK	10	3	2	P62808;Q2M2T1	K9(Acety)	0	9.58875e+07	91.73	1.71819e-07	2	1805.02	-0.697928	38.4819	1
	LLLPGELAKHAVSEGTK	17	3	2	P62808;Q2M2T1		0	3.55139e+08	87.27	4.22343e-07	2	1763	-1.30315	33.9818	1
	HAVSEGtkAVTK	7	3	2	P62808;Q2M2T1	T7(Phosp); K8(DimetR0)	0	4.5976e+06	83.65	4.00234e-07	2	1341.71	4.28064	11.2099	1
	VLkQVHPDTGISSK	7	3	2	P62808;Q2M2T1	K3(Acety)	0	7.59904e+07	78.72	2.19072e-06	2	1550.85	-0.980009	24.5148	1
	HAVSEGTkAVTK	9	3	2	P62808;Q2M2T1	K8(Acety)	0	1.76579e+07	76.5	1.99918e-06	2	1269.68	-1.48562	12.6914	1
	KESYSVYVYKVLK	3	3	2	P62808;Q2M2T1		0	1.54162e+07	75.91	4.72891e-06	2	1605.89	-0.82484	33.0159	2
	kGSkkAVTkAQK	8	3	2	P62808;Q2M2T1	K1(Acety); K4(Acety); K5(Acety); K9(Acety)	0	3.33501e+07	72.89	6.44097e-06	2	1441.84	-0.1828	20.121	4
	VLKQVHPDTGISSK	27	3	2	P62808;Q2M2T1		0	6.14801e+08	72.77	8.06407e-06	2	1508.84	-1.0478	20.0162	1
	ESYSVYVYKVLKQVHPDTGISSK	5	3	2	P62808;Q2M2T1		0	4.18155e+07	71.27	6.35004e-05	3	2627.37	0.0483197	38.584	2
	HAVSEGTKAVTK	15	3	2	P62808;Q2M2T1		0	2.46219e+07	71.22	6.41451e-06	2	1227.67	-0.492478	11.0075	1
	AmGImNSFVNDIFERIAGEASR	4	2	2	P62808;Q2M2T1	M2(Oxida); M5(Oxida)	0	4.20845e+07	69.98	5.05372e-05	3	2460.17	0.301265	50.3408	1
	PEPAKSAPAPK	9	2	2	P62808;Q2M2T1		0	4.45257e+06	62.96	3.43961e-05	2	1092.6	-0.50856	11.181	1
	ESYSVYVYKVLK	5	3	2	P62808;Q2M2T1		0	1.34794e+08	62.52	7.96535e-05	2	1477.79	0.177028	35.5822	1
	KESYSVYVYK	237	3	2	P62808;Q2M2T1		0	7270973792	60.77	6.89287e-05	2	1265.64	1.1903	27.125	1
	LLLPGELAK	218	3	2	P62808;Q2M2T1		0	38391411840	60.66	2.64576e-05	2	953.606	3.54504	34.0653	0
	kESYSVYVYK	7	3	2	P62808;Q2M2T1	K1(Acety)	0	3.31514e+07	58.51	0.000109431	2	1307.65	0.638694	28.3137	1
	EIQTAVR	64	3	2	P62808;Q2M2T1		0	8.06166e+08	58.43	5.68454e-05	2	816.457	-0.730708	13.1719	0
	QVHPDTGISSK	130	3	2	P62808;Q2M2T1		0	9387229130	57.76	0.000122606	2	1168.6	-0.601575	17.771	0
	SRKESYSVYVYK	14	3	2	P62808;Q2M2T1		0	1.95502e+08	52.96	0.000778211	2	1508.77	-0.519714	24.2067	2
	kAVTkAQK	6	3	2	P62808;Q2M2T1	K1(Acety); K5(Acety)	0	1.58178e+07	50.75	0.000435843	2	957.572	-0.879607	12.2218	2
	AVTKYTSSK	8	2	1	P62808		0	3.08741e+06	50.44	0.000370948	2	984.536	0.0589883	10.8212	1
	ESYSVYVYK	144	3	2	P62808;Q2M2T1		0	1.5996e+10	48.16	0.000796626	2	1137.55	0.357927	28.3875	0
	HAVSEGTK	15	3	2	P62808;Q2M2T1		0	7.73974e+06	47.96	0.000367099	2	828.421	0.106035	10.2297	0
	KGSkkAVTkAQK	7	3	2	P62808;Q2M2T1	K4(Acety); K5(Acety); K9(Acety)	0	4.29666e+06	46.69	0.00280504	2	1399.83	-0.929579	13.9906	4
	SRKESYSVYVYKVLKQVHPDTGISSK	10	3	2	P62808;Q2M2T1		0	1.71065e+06	46.2	0.0280807	3	2998.6	-0.78239	63.3351	4
	QVHPDTGISSKAmGImNSFVNDIFER	8	2	2	P62808;Q2M2T1	M13(Oxida); M16(Oxida)	0	5.49251e+07	44.65	0.0314215	3	2925.39	-0.267877	39.3536	1
	EIQTAVRLLLPGELAKHAVSEGTKAVTKYTSSK	5	2	1	P62808		0	1.15412e+07	43.27	0.0543955	4	3525.96	-0.222282	63.0256	4
	LAHYNKR	32	3	2	P62808;Q2M2T1		0	2.926e+08	40.75	0.00339503	2	901.5	-0.462348	9.2331	1
	STITSREIQTAVR	14	3	2	P62808;Q2M2T1		0	9.2489e+07	40	0.013235	2	1461.8	-0.745916	25.3673	1
	ESYSVYVykVLK	5	3	2	P62808;Q2M2T1	Y8(Phosp); K9(DimetR0)	0	1.57328e+07	39.74	0.0204907	2	1591.84	4.07549	36.2018	1
	QVHPDTGISSkAmGImNSFVNDIFER	1	2	2	P62808;Q2M2T1	K11(Acety); M13(Oxida); M16(Oxida)	0	3.3159e+06	39.28	0.110826	3	2967.4	-0.3669	45.9435	1
	EIQTAVRLLLPGELAK	10	3	2	P62808;Q2M2T1		0	2.6255e+07	38.68	0.0229705	3	1751.04	0.65964	39.587	1
	LAHYNKRSTITSR	2	3	2	P62808;Q2M2T1		0	3.21071e+06	38.53	0.0236234	2	1546.84	-0.628138	12.5088	2
	AVTkYTSSK	4	2	1	P62808	K4(Acety)	0	4704621	37.11	0.00869576	2	1026.55	-0.0622594	13.7971	1
	IAGEASRLAHYNKR	6	3	2	P62808;Q2M2T1		0	1.05104e+07	34.32	0.0639988	3	1585.86	-0.15598	20.0073	2
	RSTITSR	14	3	2	P62808;Q2M2T1		0	1.61554e+07	34.17	0.0176865	2	820.464	-0.0276974	10.5908	1
	KESYSVYVYKVLKQVHPDTGISSK	4	3	2	P62808;Q2M2T1		0	4.1769e+07	31.28	0.711145	4	2755.47	0.307255	37.0209	3
	GSkkAVTkAQK	3	3	2	P62808;Q2M2T1	K3(Acety); K4(Acety); K8(Acety)	0	1.97813e+06	28.88	0.130843	2	1271.73	-1.02376	17.3514	3
	eSYSVYVYK	2	3	2	P62808;Q2M2T1	N-Term(Glu->)	0	2.17134e+08	28.23	0.0695203	2	1119.54	2.16271	27.6176	0
	KAVTkAQK	2	3	2	P62808;Q2M2T1	K5(Acety)	0	902581	28	0.0838408	2	915.562	-0.520072	9.84001	2
	VLkQVHPDTGISSK	1	3	2	P62808;Q2M2T1	K3(Dimet)	0	1.20972e+06	27.97	0.253346	2	1536.87	-0.582055	20.3846	1
	PEPAkSAPAPK	3	2	2	P62808;Q2M2T1	K5(Acety)	0	3.83409e+07	27.57	0.120389	2	1134.62	0.64001	14.2829	1
	STITSREIQTAVRLLLPGELAK	11	3	2	P62808;Q2M2T1		0	1.04028e+08	26.94	0.810624	4	2396.39	0.346742	48.0363	2
	mPEPAkSAPAPkkGskk	1	2	2	P62808;Q2M2T1	M1(Oxida); K6(Dimet); K12(Methy); K13(Methy); S15(Phosp); K16(Methy); K17(Dimet)	0	1.10108e+06	26.63	0.717752	2	1946.06	3.22411	54.7994	4
	LLLPGELAKHAVSEGTKAVTKYTSSK	3	2	1	P62808		0	7.74505e+07	22.98	3.66599	4	2728.52	0.120827	39.2079	3
	KESYSVYVYk	8	3	2	P62808;Q2M2T1	K10(Methy)	0	8.89786e+08	22.59	0.498756	2	1279.66	0.485288	28.3961	1
	LLLPGELAkHAVSEGtk	4	3	2	P62808;Q2M2T1	K9(MethyR0); T16(Phosp); K17(MethyR0)	0	34859948	20.65	2.4732	3	1877.05	3.0527	34.8086	1
	KESYSVYVYk	1	3	2	P62808;Q2M2T1	K10(MethyR0)	0	1.89315e+07	16.9	1.94067	2	1282.69	9.69187	22.846	1
	eSYSVYVYkVLk	1	3	2	P62808;Q2M2T1	N-Term(Glu->); K9(Acety); K12(MethyR0)	0	14675739	15.51	4.59746	3	1518.82	-4.79965	36.314	1
	HAVSEGTKAVTkyTSSK	1	2	1	P62808	K12(DimetR0); Y13(Phosp)	0	1.61347e+06	13.29	14.4488	3	1907.98	3.73341	19.9736	2
	GSkkAVtkAQkkDGKk	1	2	1	P62808	K3(MethyR0); K4(Acety); T7(Phosp); K8(Acety); K11(Dimet); K12(MethyR0); K16(MethyR0)	0	1.03827e+06	11.28	17.7879	2	1945.15	-4.38115	48.2493	6
	RSTITSREIQTAVR	1	3	2	P62808;Q2M2T1		0	5.41654e+06	11.26	14.1254	3	1617.9	-0.97463	23.5507	2
	mPEPAkSAPAPK	1	2	2	P62808;Q2M2T1	M1(Oxida); K6(Acety)	0	1.5127e+06	11.14	8.00665	2	1281.66	3.88561	17.7977	1
Q2M2T1	Histone H2B type 1-K OS=Bos taurus GN=HIST1H2BK PE=1 SV=3 - [H2B1K_BOVIN]	23468.5	97.62	1	2	37	1445	2.38186e+10	126	13.8666	10.2866
	Sequence	# PSMs	# Proteins	# Protein Groups	Protein Group Accessions	Modifications	ΔCn	Area	IonScore	Exp Value	Charge	MH+ [Da]	ΔM [ppm]	RT [min]	# Missed Cleavages
	AmGIMNSFVNDIFER	66	2	2	P62808;Q2M2T1	M2(Oxida)	0	1.89148e+09	114.02	5.41712e-10	2	1759.81	-0.307986	47.3263	0
	AmGImNSFVNDIFER	222	2	2	P62808;Q2M2T1	M2(Oxida); M5(Oxida)	0	17068261376	106.53	3.01814e-09	2	1775.8	-3.01198	62.0744	0
	AMGIMNSFVNDIFER	28	2	2	P62808;Q2M2T1		0	6.70788e+08	106.4	3.38934e-09	2	1743.82	0.905569	50.0905	0
	LLLPGELAkHAVSEGTK	10	3	2	P62808;Q2M2T1	K9(Acety)	0	9.58875e+07	91.73	1.71819e-07	2	1805.02	-0.697928	38.4819	1
	LLLPGELAKHAVSEGTK	17	3	2	P62808;Q2M2T1		0	3.55139e+08	87.27	4.22343e-07	2	1763	-1.30315	33.9818	1
	HAVSEGtkAVTK	7	3	2	P62808;Q2M2T1	T7(Phosp); K8(DimetR0)	0	4.5976e+06	83.65	4.00234e-07	2	1341.71	4.28064	11.2099	1
	HAVSEGTKAVTKYTSAK	10	1	1	Q2M2T1		0	3.16094e+07	81.3	1.85105e-06	2	1777.94	-1.14906	20.1827	2
	VLkQVHPDTGISSK	7	3	2	P62808;Q2M2T1	K3(Acety)	0	7.59904e+07	78.72	2.19072e-06	2	1550.85	-0.980009	24.5148	1
	HAVSEGTkAVTK	9	3	2	P62808;Q2M2T1	K8(Acety)	0	1.76579e+07	76.5	1.99918e-06	2	1269.68	-1.48562	12.6914	1
	KESYSVYVYKVLK	3	3	2	P62808;Q2M2T1		0	1.54162e+07	75.91	4.72891e-06	2	1605.89	-0.82484	33.0159	2
	kGSkkAVTkAQK	8	3	2	P62808;Q2M2T1	K1(Acety); K4(Acety); K5(Acety); K9(Acety)	0	3.33501e+07	72.89	6.44097e-06	2	1441.84	-0.1828	20.121	4
	VLKQVHPDTGISSK	27	3	2	P62808;Q2M2T1		0	6.14801e+08	72.77	8.06407e-06	2	1508.84	-1.0478	20.0162	1
	ESYSVYVYKVLKQVHPDTGISSK	5	3	2	P62808;Q2M2T1		0	4.18155e+07	71.27	6.35004e-05	3	2627.37	0.0483197	38.584	2
	HAVSEGTKAVTK	15	3	2	P62808;Q2M2T1		0	2.46219e+07	71.22	6.41451e-06	2	1227.67	-0.492478	11.0075	1
	AmGImNSFVNDIFERIAGEASR	4	2	2	P62808;Q2M2T1	M2(Oxida); M5(Oxida)	0	4.20845e+07	69.98	5.05372e-05	3	2460.17	0.301265	50.3408	1
	PEPAKSAPAPK	9	2	2	P62808;Q2M2T1		0	4.45257e+06	62.96	3.43961e-05	2	1092.6	-0.50856	11.181	1
	ESYSVYVYKVLK	5	3	2	P62808;Q2M2T1		0	1.34794e+08	62.52	7.96535e-05	2	1477.79	0.177028	35.5822	1
	KESYSVYVYK	237	3	2	P62808;Q2M2T1		0	7270973792	60.77	6.89287e-05	2	1265.64	1.1903	27.125	1
	LLLPGELAK	218	3	2	P62808;Q2M2T1		0	38391411840	60.66	2.64576e-05	2	953.606	3.54504	34.0653	0
	kESYSVYVYK	7	3	2	P62808;Q2M2T1	K1(Acety)	0	3.31514e+07	58.51	0.000109431	2	1307.65	0.638694	28.3137	1
	EIQTAVR	64	3	2	P62808;Q2M2T1		0	8.06166e+08	58.43	5.68454e-05	2	816.457	-0.730708	13.1719	0
	QVHPDTGISSK	130	3	2	P62808;Q2M2T1		0	9387229130	57.76	0.000122606	2	1168.6	-0.601575	17.771	0
	SRKESYSVYVYK	14	3	2	P62808;Q2M2T1		0	1.95502e+08	52.96	0.000778211	2	1508.77	-0.519714	24.2067	2
	kAVTkAQK	6	3	2	P62808;Q2M2T1	K1(Acety); K5(Acety)	0	1.58178e+07	50.75	0.000435843	2	957.572	-0.879607	12.2218	2
	ESYSVYVYK	144	3	2	P62808;Q2M2T1		0	1.5996e+10	48.16	0.000796626	2	1137.55	0.357927	28.3875	0
	HAVSEGTK	15	3	2	P62808;Q2M2T1		0	7.73974e+06	47.96	0.000367099	2	828.421	0.106035	10.2297	0
	KGSkkAVTkAQK	7	3	2	P62808;Q2M2T1	K4(Acety); K5(Acety); K9(Acety)	0	4.29666e+06	46.69	0.00280504	2	1399.83	-0.929579	13.9906	4
	SRKESYSVYVYKVLKQVHPDTGISSK	10	3	2	P62808;Q2M2T1		0	1.71065e+06	46.2	0.0280807	3	2998.6	-0.78239	63.3351	4
	QVHPDTGISSKAmGImNSFVNDIFER	8	2	2	P62808;Q2M2T1	M13(Oxida); M16(Oxida)	0	5.49251e+07	44.65	0.0314215	3	2925.39	-0.267877	39.3536	1
	LAHYNKR	32	3	2	P62808;Q2M2T1		0	2.926e+08	40.75	0.00339503	2	901.5	-0.462348	9.2331	1
	AVTKYTSAK	3	1	1	Q2M2T1		0	701411	40.18	0.00326676	2	968.541	-0.0279194	11.2037	1
	STITSREIQTAVR	14	3	2	P62808;Q2M2T1		0	9.2489e+07	40	0.013235	2	1461.8	-0.745916	25.3673	1
	ESYSVYVykVLK	5	3	2	P62808;Q2M2T1	Y8(Phosp); K9(DimetR0)	0	1.57328e+07	39.74	0.0204907	2	1591.84	4.07549	36.2018	1
	QVHPDTGISSkAmGImNSFVNDIFER	1	2	2	P62808;Q2M2T1	K11(Acety); M13(Oxida); M16(Oxida)	0	3.3159e+06	39.28	0.110826	3	2967.4	-0.3669	45.9435	1
	EIQTAVRLLLPGELAK	10	3	2	P62808;Q2M2T1		0	2.6255e+07	38.68	0.0229705	3	1751.04	0.65964	39.587	1
	LAHYNKRSTITSR	2	3	2	P62808;Q2M2T1		0	3.21071e+06	38.53	0.0236234	2	1546.84	-0.628138	12.5088	2
	IAGEASRLAHYNKR	6	3	2	P62808;Q2M2T1		0	1.05104e+07	34.32	0.0639988	3	1585.86	-0.15598	20.0073	2
	RSTITSR	14	3	2	P62808;Q2M2T1		0	1.61554e+07	34.17	0.0176865	2	820.464	-0.0276974	10.5908	1
	KESYSVYVYKVLKQVHPDTGISSK	4	3	2	P62808;Q2M2T1		0	4.1769e+07	31.28	0.711145	4	2755.47	0.307255	37.0209	3
	GSkkAVTkAQK	3	3	2	P62808;Q2M2T1	K3(Acety); K4(Acety); K8(Acety)	0	1.97813e+06	28.88	0.130843	2	1271.73	-1.02376	17.3514	3
	eSYSVYVYK	2	3	2	P62808;Q2M2T1	N-Term(Glu->)	0	2.17134e+08	28.23	0.0695203	2	1119.54	2.16271	27.6176	0
	KAVTkAQK	2	3	2	P62808;Q2M2T1	K5(Acety)	0	902581	28	0.0838408	2	915.562	-0.520072	9.84001	2
	VLkQVHPDTGISSK	1	3	2	P62808;Q2M2T1	K3(Dimet)	0	1.20972e+06	27.97	0.253346	2	1536.87	-0.582055	20.3846	1
	PEPAkSAPAPK	3	2	2	P62808;Q2M2T1	K5(Acety)	0	3.83409e+07	27.57	0.120389	2	1134.62	0.64001	14.2829	1
	STITSREIQTAVRLLLPGELAK	11	3	2	P62808;Q2M2T1		0	1.04028e+08	26.94	0.810624	4	2396.39	0.346742	48.0363	2
	mPEPAkSAPAPkkGskk	1	2	2	P62808;Q2M2T1	M1(Oxida); K6(Dimet); K12(Methy); K13(Methy); S15(Phosp); K16(Methy); K17(Dimet)	0	1.10108e+06	26.63	0.717752	2	1946.06	3.22411	54.7994	4
	KESYSVYVYk	8	3	2	P62808;Q2M2T1	K10(Methy)	0	8.89786e+08	22.59	0.498756	2	1279.66	0.485288	28.3961	1
	LLLPGELAkHAVSEGtk	4	3	2	P62808;Q2M2T1	K9(MethyR0); T16(Phosp); K17(MethyR0)	0	34859948	20.65	2.4732	3	1877.05	3.0527	34.8086	1
	KESYSVYVYk	1	3	2	P62808;Q2M2T1	K10(MethyR0)	0	1.89315e+07	16.9	1.94067	2	1282.69	9.69187	22.846	1
	eSYSVYVYkVLk	1	3	2	P62808;Q2M2T1	N-Term(Glu->); K9(Acety); K12(MethyR0)	0	14675739	15.51	4.59746	3	1518.82	-4.79965	36.314	1
	kGskKAVTKAQKIDGkK	1	1	1	Q2M2T1	K1(MethyR0); S3(Phosp); K4(Acety); K16(DimetR0)	0	7.61562e+06	12.09	14.2206	2	1988.18	-9.73198	47.7672	6
	GSKKAVTkAQkIDGk	1	1	1	Q2M2T1	K8(Acety); K11(Acety); K15(DimetR0)	0	0	11.6	10.4812	4	1677.02	0.101175	36.7733	4
	RSTITSREIQTAVR	1	3	2	P62808;Q2M2T1		0	5.41654e+06	11.26	14.1254	3	1617.9	-0.97463	23.5507	2
	mPEPAkSAPAPK	1	2	2	P62808;Q2M2T1	M1(Oxida); K6(Acety)	0	1.5127e+06	11.14	8.00665	2	1281.66	3.88561	17.7977	1
	AVTkAQkIDGkK	1	1	1	Q2M2T1	K4(Dimet); K7(Acety); K11(Acety)	0	3.86448e+07	10.84	9.1603	3	1398.83	-0.784462	28.6334	3
P0C0S9	Histone H2A type 1 OS=Bos taurus PE=1 SV=2 - [H2A1_BOVIN]	13042.9	75.38	2	1	15	882	2.37703e+10	130	14.0829	10.9019
	Sequence	# PSMs	# Proteins	# Protein Groups	Protein Group Accessions	Modifications	ΔCn	Area	IonScore	Exp Value	Charge	MH+ [Da]	ΔM [ppm]	RT [min]	# Missed Cleavages
	VTIAQGGVLPNIQAVLLPK	191	3	2	P0C0S9;A1A4R1		0	22905471488	103.78	7.56132e-09	2	1931.18	3.51883	48.1644	0
	AGLQFPVGR	249	5	3	P0C0S9;A1A4R1;P0C0S4		0	34267197440	91.14	4.83783e-08	2	944.531	-0.0473636	50.2579	0
	VGAGAPVYLAAVLEYLTAEILELAGNAAR	4	2	1	P0C0S9		0	5.32572e+06	89.74	1.06371e-06	4	2915.59	0.0693175	61.2949	0
	VTIAQGGVLPNIQAVLLPKK	16	3	2	P0C0S9;A1A4R1		0	1.66317e+08	77.7	2.95409e-06	2	2059.26	-0.671371	45.325	1
	HLQLAIRNDEELNK	31	3	2	P0C0S9;A1A4R1		0	1.20928e+08	69.55	2.28878e-05	2	1692.9	0.172763	27.5037	1
	NDEELNKLLGK	17	3	2	P0C0S9;A1A4R1		0	1.44064e+09	67.56	1.5934e-05	2	1272.68	-0.464134	31.1353	1
	SSRAGLQFPVGR	2	3	2	P0C0S9;A1A4R1		0	1.1312e+07	62.53	6.02869e-05	2	1274.7	-0.480836	28.6009	1
	VTIAQGGVLPNIQAVLLPkK	3	3	2	P0C0S9;A1A4R1	K19(Acety)	0	6.53404e+06	61.65	0.000147212	2	2101.27	-0.338395	47.0071	1
	NDEELNKLLGKVTIAQGGVLPNIQAVLLPK	2	3	2	P0C0S9;A1A4R1		0	1.02369e+07	57.74	0.00105924	3	3184.83	0.727686	50.8537	2
	HLQLAIRNDEELNKLLGK	20	3	2	P0C0S9;A1A4R1		0	1.88984e+08	57.59	0.000643511	3	2104.19	0.0873912	36.9256	2
	NDEELNkLLGK	2	3	2	P0C0S9;A1A4R1	K7(Acety)	0	1.05151e+07	56.55	0.000214891	2	1314.69	-1.51703	34.3858	1
	HLQLAIR	315	5	3	P0C0S9;A1A4R1;P0C0S4		0	1.41384e+10	42.09	0.00142453	2	850.526	0.314247	27.552	0
	LLGKVTIAQGGVLPNIQAVLLPK	7	3	2	P0C0S9;A1A4R1		0	2.27956e+07	39.74	0.0169287	3	2342.46	1.05678	48.225	1
	LLRKGNYAER	4	3	2	P0C0S9;A1A4R1		0	2.4241e+07	32.59	0.0468187	3	1219.69	-0.637713	12.3589	2
	NDEELNK	14	3	2	P0C0S9;A1A4R1		0	1.3975e+08	29.6	0.0212169	2	861.395	-0.0793023	10.5865	0
	AGLQFPVGRVHR	3	3	2	P0C0S9;A1A4R1		0	3.91194e+07	25.45	0.303063	2	1336.76	-0.66926	29.0603	1
	KTESHHK	2	1	1	P0C0S9		0	873111	12.56	1.72766	2	866.448	-0.197162	10.562	1
A1A4R1	Histone H2A type 2-C OS=Bos taurus GN=HIST2H2AC PE=2 SV=1 - [H2A2C_BOVIN]	12945	78.29	1	1	15	880	2.37703e+10	129	13.9798	10.9019
	Sequence	# PSMs	# Proteins	# Protein Groups	Protein Group Accessions	Modifications	ΔCn	Area	IonScore	Exp Value	Charge	MH+ [Da]	ΔM [ppm]	RT [min]	# Missed Cleavages
	VTIAQGGVLPNIQAVLLPK	191	3	2	P0C0S9;A1A4R1		0	22905471488	103.78	7.56132e-09	2	1931.18	3.51883	48.1644	0
	AGLQFPVGR	249	5	3	P0C0S9;A1A4R1;P0C0S4		0	34267197440	91.14	4.83783e-08	2	944.531	-0.0473636	50.2579	0
	VTIAQGGVLPNIQAVLLPKK	16	3	2	P0C0S9;A1A4R1		0	1.66317e+08	77.7	2.95409e-06	2	2059.26	-0.671371	45.325	1
	VGAGAPVYmAAVLEYLTAEILELAGNAAR	3	1	1	A1A4R1	M9(Oxida)	0	8.54304e+06	71.03	9.2979e-05	3	2949.54	0.882137	58.7101	0
	HLQLAIRNDEELNK	31	3	2	P0C0S9;A1A4R1		0	1.20928e+08	69.55	2.28878e-05	2	1692.9	0.172763	27.5037	1
	NDEELNKLLGK	17	3	2	P0C0S9;A1A4R1		0	1.44064e+09	67.56	1.5934e-05	2	1272.68	-0.464134	31.1353	1
	SSRAGLQFPVGR	2	3	2	P0C0S9;A1A4R1		0	1.1312e+07	62.53	6.02869e-05	2	1274.7	-0.480836	28.6009	1
	VTIAQGGVLPNIQAVLLPkK	3	3	2	P0C0S9;A1A4R1	K19(Acety)	0	6.53404e+06	61.65	0.000147212	2	2101.27	-0.338395	47.0071	1
	NDEELNKLLGKVTIAQGGVLPNIQAVLLPK	2	3	2	P0C0S9;A1A4R1		0	1.02369e+07	57.74	0.00105924	3	3184.83	0.727686	50.8537	2
	HLQLAIRNDEELNKLLGK	20	3	2	P0C0S9;A1A4R1		0	1.88984e+08	57.59	0.000643511	3	2104.19	0.0873912	36.9256	2
	NDEELNkLLGK	2	3	2	P0C0S9;A1A4R1	K7(Acety)	0	1.05151e+07	56.55	0.000214891	2	1314.69	-1.51703	34.3858	1
	HLQLAIR	315	5	3	P0C0S9;A1A4R1;P0C0S4		0	1.41384e+10	42.09	0.00142453	2	850.526	0.314247	27.552	0
	LLGKVTIAQGGVLPNIQAVLLPK	7	3	2	P0C0S9;A1A4R1		0	2.27956e+07	39.74	0.0169287	3	2342.46	1.05678	48.225	1
	LLRKGNYAER	4	3	2	P0C0S9;A1A4R1		0	2.4241e+07	32.59	0.0468187	3	1219.69	-0.637713	12.3589	2
	NDEELNK	14	3	2	P0C0S9;A1A4R1		0	1.3975e+08	29.6	0.0212169	2	861.395	-0.0793023	10.5865	0
	AGLQFPVGRVHR	3	3	2	P0C0S9;A1A4R1		0	3.91194e+07	25.45	0.303063	2	1336.76	-0.66926	29.0603	1
	kTEsHkAKSk	1	1	1	A1A4R1	K1(MethyR0); S4(Phosp); K6(DimetR0); K10(Methy)	0	1.02351e+07	14.76	3.18655	2	1288.75	9.80104	29.3645	3
P02253	Histone H1.2 OS=Bos taurus GN=HIST1H1C PE=1 SV=2 - [H12_BOVIN]	10739.8	91.55	3	3	63	664	1.0993e+10	213	21.3427	11.0044
	Sequence	# PSMs	# Proteins	# Protein Groups	Protein Group Accessions	Modifications	ΔCn	Area	IonScore	Exp Value	Charge	MH+ [Da]	ΔM [ppm]	RT [min]	# Missed Cleavages
	KALAAAGYDVEKNNSR	10	5	3	P02253;A7MAZ5;G3N131		0	9.45238e+07	103.46	9.66776e-09	2	1706.88	-0.914263	20.17	2
	ASGPPVSELITKAVAASK	10	3	2	P02253;A7MAZ5		0	1.14046e+08	94.48	7.6138e-08	2	1725.97	-0.0500567	39.8138	1
	ALAAAGYDVEKNNSR	18	5	3	P02253;A7MAZ5;G3N131		0	1.12855e+09	94.07	6.00149e-08	2	1578.79	0.0162617	22.1822	1
	ASGPPVSELITK	94	3	2	P02253;A7MAZ5		0	15392387029	93.4	3.68642e-08	2	1198.66	-2.90912	31.3016	0
	KALAAAGYDVEK	31	5	3	P02253;A7MAZ5;G3N131		0	1.05078e+09	93.23	4.37308e-08	2	1235.66	-0.262187	22.6274	1
	KASGPPVSELITK	29	3	2	P02253;A7MAZ5		0	3.78187e+09	90.96	7.84442e-08	2	1326.76	-0.143552	28.6133	1
	SGVSLAALK	22	4	3	P02253;A7MAZ5;G3N131		0	5.95688e+09	84.51	2.11159e-07	2	845.509	0.289385	29.0688	0
	ASGPPVSELITkAVAASK	6	3	2	P02253;A7MAZ5	K12(Acety)	0	1.32678e+07	81.64	1.62598e-06	2	1767.98	-0.704748	44.7765	1
	SLVSKGTLVQTK	12	3	2	P02253;A7MAZ5		0	1.22557e+08	81.41	5.90142e-07	2	1260.75	-0.957476	24.055	1
	ALAAAGYDVEK	154	5	3	P02253;A7MAZ5;G3N131		0	11629596032	79.23	7.27736e-07	2	1107.57	2.13157	23.9062	0
	SGVSLAALKK	28	4	3	P02253;A7MAZ5;G3N131		0	3.04776e+09	76.83	1.27503e-06	2	973.607	2.885	25.3844	1
	GTLVQTkGTGASGSFK	1	4	3	P02253;A7MAZ5;G3N131	K7(Acety)	0	6.5047e+06	75.38	5.52523e-06	2	1580.83	1.23434	27.1144	1
	SLVSkGTLVQTK	4	3	2	P02253;A7MAZ5	K5(Acety)	0	1.76188e+07	71.43	6.90671e-06	2	1302.76	0.43213	29.9928	1
	SETAPAAPAAAPPAEK	10	1	1	P02253		0	3.95442e+08	70.81	9.9831e-06	2	1478.75	-0.122141	20.3499	0
	ERSGVSLAALKK	7	4	3	P02253;A7MAZ5;G3N131		0	123342508	62.67	5.39673e-05	3	1258.75	0.489326	23.9265	2
	GTLVQTKGTGASGSFK	3	4	3	P02253;A7MAZ5;G3N131		0	2.50618e+07	60.04	0.000163388	2	1538.82	-0.120241	22.4104	1
	AKKPAAAAVTK	3	1	1	P02253		0	3.18123e+06	58.28	6.38209e-05	2	1055.66	-0.181195	10.5572	1
	KAsGPPVSELITK	8	3	2	P02253;A7MAZ5	S3(Phosp)	0	8.43114e+07	57.92	0.000182745	2	1406.73	0.808192	29.9454	1
	kALAAAGYDVEK	4	5	3	P02253;A7MAZ5;G3N131	K1(Acety)	0	0	57.91	0.000140449	2	1277.67	0.940761	26.7276	1
	SGVSLAALKKALAAAGYDVEKNNSR	2	4	3	P02253;A7MAZ5;G3N131		0	1.41549e+07	57.88	0.00114401	4	2533.37	0.591044	42.231	3
	SLVskGTLVQTK	6	3	2	P02253;A7MAZ5	S4(Phosp); K5(DimetR0)	0	15384671	56.6	0.000265485	2	1374.79	3.73936	24.7682	1
	kASGPPVSELITK	16	3	2	P02253;A7MAZ5	K1(Methy)	0	9.57819e+08	55.64	0.000275354	2	1340.78	-0.893528	28.67	1
	AATGEAKPK	6	2	2	P02253;A7MAZ5		0	1.76517e+06	51.89	0.000252062	2	872.484	-0.0368583	10.2306	0
	ASGPPVSELITKAVAASKER	6	3	2	P02253;A7MAZ5		0	2.91951e+07	51.76	0.00230115	3	2011.12	0.657225	39.4111	2
	SGVSLAALKKALAAAGYDVEK	10	4	3	P02253;A7MAZ5;G3N131		0	3.90033e+07	51.54	0.00246106	3	2062.15	0.0299675	43.2512	2
	GTLVQtkGTGASGSFK	1	4	3	P02253;A7MAZ5;G3N131	T6(Phosp); K7(DimetR0)	0	7.71301e+06	51.36	0.00144802	2	1652.86	5.05803	23.0569	1
	KPAAAAVTKKVAK	2	1	1	P02253		0	1.8044e+06	49.41	0.000687308	2	1282.82	0.184811	11.6167	2
	IKLGLKSLVSKGTLVQTK	2	3	2	P02253;A7MAZ5		0	1.71615e+07	49.26	0.00147154	3	1913.22	0.0335561	34.2912	3
	GTGASGSFK	12	6	4	P02251;P02253;A7MAZ5;G3N131		0	1.31823e+08	48.66	0.000466295	2	811.393	-1.86021	11.2113	0
	LGLKSLVSK	6	4	3	P02251;P02253;A7MAZ5		0	5.65917e+07	48.58	0.000524887	2	944.614	0.256233	28.4601	1
	LNKKAATGEAKPK	2	2	2	P02253;A7MAZ5		0	432046	48.57	0.00168601	2	1355.8	0.257869	10.7692	2
	LGLkSLVSK	1	4	3	P02251;P02253;A7MAZ5	K4(Acety)	0	6.93226e+06	47.19	0.00100076	2	986.622	-2.97146	34.4969	1
	ERSGVSLAALK	6	4	3	P02253;A7MAZ5;G3N131		0	4.19334e+07	45.34	0.0022092	2	1130.65	1.74364	26.7332	1
	GTGASGSFKLNK	8	4	3	P02253;A7MAZ5;G3N131		0	4.448e+07	44.01	0.00302263	2	1166.62	-0.600922	19.9807	1
	GTGASGSFKLNKK	17	4	3	P02253;A7MAZ5;G3N131		0	7.83638e+06	42.41	0.0063038	2	1294.71	0.307629	15.7257	2
	GTGASGSFKLNKKAATGEAKPK	4	2	2	P02253;A7MAZ5		0	1.92499e+07	40.39	0.0402118	3	2148.18	-0.701494	18.8368	3
	LGLKSLVSKGTLVQTK	2	3	2	P02253;A7MAZ5		0	1.17072e+07	37.08	0.0235551	4	1672.04	0.774709	32.8684	2
	SETAPAAPAAAPPAEKTPVK	6	1	1	P02253		0	1.02566e+07	36.23	0.0749954	3	1904.01	0.579122	23.2446	1
	RKASGPPVSELITK	5	3	2	P02253;A7MAZ5		0	1.06261e+08	33.94	0.0528977	3	1482.87	0.942946	26.5676	2
	KPAAAAVTKK	1	1	1	P02253		0	3.06918e+06	33.93	0.016001	2	984.619	-0.865351	9.05493	1
	ALAAAGYDVEKNNSRIK	2	5	3	P02253;A7MAZ5;G3N131		0	8.94808e+06	33.55	0.115427	3	1819.97	-0.408844	24.4741	2
	SGVSLAALkK	1	4	3	P02253;A7MAZ5;G3N131	K9(Acety)	0	6.87178e+06	31.78	0.0397914	2	1015.61	-0.178988	32.1467	1
	KATGAATPK	1	2	2	P02253;A7MAZ5		0	434864	30.73	0.0421794	2	844.489	0.089794	10.3243	1
	RkASGPPVSELITK	4	3	2	P02253;A7MAZ5	K2(Methy)	0	4.31464e+07	29.98	0.127938	3	1496.88	2.68711	26.9859	2
	AAkPKKAAksAAKAVKPK	4	1	1	P02253	K3(MethyR0); K9(Acety); S10(Phosp)	0	7.5995e+07	29.15	0.261298	3	1932.16	-0.192179	49.0563	4
	ASGPPVSELItkAVAASK	2	3	2	P02253;A7MAZ5	T11(Phosp); K12(DimetR0)	0	7.18625e+06	29.01	0.334104	3	1840.02	4.22497	40.2614	1
	LGLkSLVSK	4	4	3	P02251;P02253;A7MAZ5	K4(MethyR0)	0	3.29516e+07	27.38	0.0507298	2	961.647	-1.46212	28.939	1
	SETAPAAPAAAPPAEKTPVKK	2	1	1	P02253		0	6.15572e+06	26.77	0.752416	3	2032.11	0.152503	21.1597	2
	LGLkSLVSK	2	4	3	P02251;P02253;A7MAZ5	K4(DimetR0)	0	1.55304e+07	25.48	0.0566278	2	978.682	-0.672087	29.0675	1
	LGLksLVSK	2	4	3	P02251;P02253;A7MAZ5	K4(DimetR0); S5(Phosp)	0	7.36241e+06	22.48	0.350826	2	1058.66	6.80142	29.1828	1
	ASGPPVSELITkAVAASK	2	3	2	P02253;A7MAZ5	K12(Methy)	0	6.1344e+06	21.84	1.42547	2	1739.99	-0.909339	40.0541	1
	KPAAAAVTK	1	1	1	P02253		0	3.9367e+07	21.32	0.220264	2	856.527	1.78351	10.4278	0
	ALAAAGYDVEkNNsR	1	5	3	P02253;A7MAZ5;G3N131	K11(DimetR0); S14(Phosp)	0	2.52184e+06	21.3	1.24392	3	1692.83	3.61293	22.4957	1
	RKAsGPPVSELITK	5	3	2	P02253;A7MAZ5	S4(Phosp)	0	3.41199e+07	20.56	1.55367	2	1562.83	0.620065	28.4048	2
	AAksAAkAVkPKAAKPK	2	1	1	P02253	K3(MethyR0); S4(Phosp); K7(Acety); K10(Dimet)	0	7.99509e+06	19.98	1.75908	2	1832.1	2.04455	46.6013	3
	SEtAPAAPAAAPPAEK	3	1	1	P02253	T3(Phosp)	0	4.04773e+07	19.72	0.886341	2	1558.7	-7.25245	22.721	0
	kAGAAKPkkAAGAAkktk	1	1	1	P02253	K1(Methy); K8(Dimet); K9(Methy); K15(Methy); K16(Acety); T17(Phosp); K18(Acety)	0	1.22576e+07	19.4	2.43466	3	1959.17	7.57908	51.4236	5
	AAkPkkAAKsAAKAVkPk	3	1	1	P02253	K3(Acety); K5(Methy); K6(MethyR0); S10(Phosp); K16(Methy); K18(Acety)	0	22935852	19.3	2.5272	2	2002.2	-0.423053	47.3459	4
	KAATGEAKPK	1	2	2	P02253;A7MAZ5		0	663306	18.15	0.844395	2	1000.58	0.0905627	10.3831	1
	AAksAAkAVKPkAAKPKVAkPk	1	1	1	P02253	K3(MethyR0); S4(Phosp); K7(Acety); K12(Dimet); K20(Methy); K22(Methy)	0	5.91606e+06	18.06	2.31502	3	2383.48	3.56988	48.4836	4
	kAAGAAkktkkATGAAtPk	2	1	1	P02253	K1(Methy); K7(Methy); K8(Methy); T9(Phosp); K10(MethyR0); K11(Methy); T17(Phosp); K19(Acety)	0	6.8893e+07	16.98	7.7112	3	2074.12	-3.68188	22.8697	5
	ktAKktPkkAk	3	1	1	P02253	K1(MethyR0); T2(Phosp); K5(Acety); T6(Phosp); K8(Acety); K9(Acety); K11(DimetR0)	0	4.20651e+08	15.92	4.1577	2	1565.86	-9.16068	19.5166	5
	kTAKKtPkkAk	3	1	1	P02253	K1(Acety); T6(Phosp); K8(DimetR0); K9(Acety); K11(Acety)	0	2.88078e+08	15.8	3.04848	3	1468.86	-9.03703	38.8373	5
	kATGAAtPkktAK	6	1	1	P02253	K1(Acety); T7(Phosp); K9(Acety); K10(Methy); T11(Phosp)	0	2.3111e+08	15.74	3.35224	2	1530.75	9.44555	26.7776	3
	kPAAAAVTKKVAksPK	1	1	1	P02253	K1(MethyR0); K13(Methy); S14(Phosp)	0	3.26628e+06	15.52	4.50553	2	1706.02	2.8181	50.378	3
	KtkKATGAATPK	1	1	1	P02253	T2(Phosp); K3(DimetR0)	0	175338554	15.44	2.79901	3	1315.76	-0.00643579	11.8646	3
	tKkAtGAAtPkkTAk	1	1	1	P02253	T1(Phosp); K3(MethyR0); T5(Phosp); T9(Phosp); K11(MethyR0); K12(Dimet); K15(DimetR0)	0	1.13744e+07	14.92	9.05926	3	1837.97	-4.34206	39.4954	4
	ATGAATPKktAk	1	1	1	P02253	K9(Dimet); T10(Phosp); K12(MethyR0)	0	4.47973e+07	14.72	3.00186	2	1269.7	1.82102	30.8126	2
	KAAtGEAkPKAk	3	1	1	P02253	T4(Phosp); K8(DimetR0); K12(Dimet)	0	549311	14.71	3.72378	2	1341.77	-2.83968	61.3997	2
	tAkktPkK	2	1	1	P02253	T1(Phosp); K3(DimetR0); K4(DimetR0); T5(Phosp); K7(Acety)	0	1.92461e+07	14.57	2.72155	2	1171.65	-7.79366	32.1385	3
	AAGAAkktkkAtGAATPK	1	1	1	P02253	K6(Acety); K7(Dimet); T8(Phosp); K9(DimetR0); K10(DimetR0); T12(Phosp)	0	2.70485e+07	14.39	11.2395	3	1969.11	4.01913	47.0563	4
	ktkKATGAAtPkk	1	1	1	P02253	K1(Acety); T2(Phosp); K3(MethyR0); T10(Phosp); K12(DimetR0); K13(Acety)	0	1.93206e+07	14.12	7.60961	3	1624.88	1.30046	37.8593	4
	AkKAGAAKPkkAAGAAKktk	2	1	1	P02253	K2(Methy); K10(Dimet); K11(Acety); K18(Methy); T19(Phosp); K20(Methy)	0	3.63825e+08	14.05	8.42394	3	2116.29	6.57905	45.1181	6
	AkKAGAAKPKKAAGAAkktk	1	1	1	P02253	K2(Methy); K17(MethyR0); K18(Acety); T19(Phosp); K20(Methy)	0	9.59255e+06	13.8	8.85847	4	2091.26	0.821756	46.6337	6
	kPAAAAVTKkVAksPkkAk	1	1	1	P02253	K1(Methy); K10(Methy); K13(Methy); S14(Phosp); K16(Dimet); K17(Methy); K19(Methy)	0	7.37033e+06	13.67	7.59635	3	2100.29	-6.52069	45.6776	5
	kAGAAKPkkAAGAAkktk	1	1	1	P02253	K1(Dimet); K8(DimetR0); K9(Methy); K15(Acety); K16(Acety); T17(Phosp); K18(Dimet)	0	9.18207e+06	13.53	6.68296	4	1993.24	7.45871	45.8104	5
	kPAAAAVtkkVAksPkKAKAAkPk	1	1	1	P02253	K1(Acety); T8(Phosp); K9(Acety); K10(Methy); K13(Dimet); S14(Phosp); K16(Methy); K22(DimetR0); K24(DimetR0)	0	3.08502e+06	13.43	10.014	4	2785.7	1.03582	50.32	6
	TAkktPkkAkKPAAAAVtK	1	1	1	P02253	K3(Acety); K4(Methy); T5(Phosp); K7(Methy); K8(MethyR0); K10(Dimet); T18(Phosp)	0	2.8493e+06	12.37	22.0444	3	2213.27	5.35765	53.2939	5
	ktkkATGAATPkktAkk	1	1	1	P02253	K1(Acety); T2(Phosp); K3(Dimet); K4(MethyR0); K12(MethyR0); K13(Acety); T14(Phosp); K16(Acety); K17(Acety)	0	6.0459e+07	12.25	26.1079	2	2148.15	-7.85643	40.901	6
	kAtGAATPkkTAkK	1	1	1	P02253	K1(Methy); T3(Phosp); K9(MethyR0); K10(Acety); K13(Acety)	0	0	12.21	11.7049	2	1595.89	-6.18985	22.1242	4
	ATGAAtPkkTAkkTPK	1	1	1	P02253	T6(Phosp); K8(MethyR0); K9(Acety); K12(Acety); K13(MethyR0)	0	2.06245e+07	12.15	14.4064	3	1797.01	-2.01525	39.9975	4
	KAAGAAKkTkKAtGAAtPk	1	1	1	P02253	K8(MethyR0); K10(Dimet); T13(Phosp); T17(Phosp); K19(Methy)	0	1.37584e+08	12.05	22.9035	3	2018.09	-7.1482	29.8235	5
	ktPKkAkkPAAAAVtkkVAk	1	1	1	P02253	K1(DimetR0); T2(Phosp); K5(Dimet); K7(Methy); K8(DimetR0); T15(Phosp); K16(Acety); K17(Acety); K20(Acety)	0	618133	12.02	13.7733	4	2460.5	4.84451	48.9046	6
	ktPkKAKkPAAAAVtkK	1	1	1	P02253	K1(MethyR0); T2(Phosp); K4(MethyR0); K8(Methy); T15(Phosp); K16(Methy)	0	7.61562e+06	11.4	16.6294	2	1988.18	4.28602	47.6491	5
	AAGAAkktkkAtGAATPk	1	1	1	P02253	K6(Dimet); K7(Methy); T8(Phosp); K9(MethyR0); K10(Acety); T12(Phosp); K18(Methy)	0	8.80943e+07	11.02	25.4994	3	1946.02	-5.57868	24.6135	4
	ktkkAtGAATPkKtAkk	1	1	1	P02253	K1(DimetR0); T2(Phosp); K3(Methy); K4(Methy); T6(Phosp); K12(Methy); T14(Phosp); K16(Methy); K17(Methy)	0	4.76651e+07	10.95	31.8277	3	2102.15	1.75626	24.5446	6
	AGAAkPkkAAGAAKkTkKAtGAAtPK	1	1	1	P02253	K5(Acety); K7(Acety); K8(Dimet); K15(MethyR0); K17(MethyR0); T20(Phosp); T24(Phosp)	0	7.74505e+07	10.75	61.2578	4	2728.52	3.20083	39.1398	6
	GTGASGsFkLNk	1	4	3	P02253;A7MAZ5;G3N131	S7(Phosp); K9(MethyR0); K12(MethyR0)	0	1.00613e+06	10.58	7.15737	2	1280.65	-3.32392	19.8816	1
	tKKATGAATPkktAkktPk	1	1	1	P02253	T1(Phosp); K11(Methy); K12(Acety); T13(Phosp); K15(Acety); K16(Acety); T17(Phosp); K19(Methy)	0	1.56673e+06	10.47	47.7836	3	2350.16	2.33698	22.4675	6
	AkkAGAAkPkKAAGAAKKTk	1	1	1	P02253	K2(MethyR0); K3(Acety); K8(Acety); K10(Acety); K20(Methy)	0	1.25553e+07	10.39	14.7629	3	2081.29	-6.50622	46.205	6
	VAksPkKAk	1	3	3	P02251;P02253;A7MAZ5	K3(MethyR0); S4(Phosp); K6(Methy); K9(Acety)	0	8.1226e+07	10.38	5.31408	2	1109.66	9.84825	35.0026	3
A7MAZ5	Histone H1.3 OS=Bos taurus GN=HIST1H1D PE=1 SV=1 - [H13_BOVIN]	10699.6	92.31	3	1	53	635	1.0993e+10	221	22.1402	10.9604
	Sequence	# PSMs	# Proteins	# Protein Groups	Protein Group Accessions	Modifications	ΔCn	Area	IonScore	Exp Value	Charge	MH+ [Da]	ΔM [ppm]	RT [min]	# Missed Cleavages
	KALAAAGYDVEKNNSR	10	5	3	P02253;A7MAZ5;G3N131		0	9.45238e+07	103.46	9.66776e-09	2	1706.88	-0.914263	20.17	2
	ASGPPVSELITKAVAASK	10	3	2	P02253;A7MAZ5		0	1.14046e+08	94.48	7.6138e-08	2	1725.97	-0.0500567	39.8138	1
	ALAAAGYDVEKNNSR	18	5	3	P02253;A7MAZ5;G3N131		0	1.12855e+09	94.07	6.00149e-08	2	1578.79	0.0162617	22.1822	1
	ASGPPVSELITK	94	3	2	P02253;A7MAZ5		0	15392387029	93.4	3.68642e-08	2	1198.66	-2.90912	31.3016	0
	KALAAAGYDVEK	31	5	3	P02253;A7MAZ5;G3N131		0	1.05078e+09	93.23	4.37308e-08	2	1235.66	-0.262187	22.6274	1
	KASGPPVSELITK	29	3	2	P02253;A7MAZ5		0	3.78187e+09	90.96	7.84442e-08	2	1326.76	-0.143552	28.6133	1
	SGVSLAALK	22	4	3	P02253;A7MAZ5;G3N131		0	5.95688e+09	84.51	2.11159e-07	2	845.509	0.289385	29.0688	0
	SETAPVAPAAPAPAEK	6	1	1	A7MAZ5		0	1.09551e+08	83.09	6.61498e-07	2	1506.78	2.76345	22.8523	0
	ASGPPVSELITkAVAASK	6	3	2	P02253;A7MAZ5	K12(Acety)	0	1.32678e+07	81.64	1.62598e-06	2	1767.98	-0.704748	44.7765	1
	SLVSKGTLVQTK	12	3	2	P02253;A7MAZ5		0	1.22557e+08	81.41	5.90142e-07	2	1260.75	-0.957476	24.055	1
	ALAAAGYDVEK	154	5	3	P02253;A7MAZ5;G3N131		0	11629596032	79.23	7.27736e-07	2	1107.57	2.13157	23.9062	0
	SGVSLAALKK	28	4	3	P02253;A7MAZ5;G3N131		0	3.04776e+09	76.83	1.27503e-06	2	973.607	2.885	25.3844	1
	GTLVQTkGTGASGSFK	1	4	3	P02253;A7MAZ5;G3N131	K7(Acety)	0	6.5047e+06	75.38	5.52523e-06	2	1580.83	1.23434	27.1144	1
	SLVSkGTLVQTK	4	3	2	P02253;A7MAZ5	K5(Acety)	0	1.76188e+07	71.43	6.90671e-06	2	1302.76	0.43213	29.9928	1
	ERSGVSLAALKK	7	4	3	P02253;A7MAZ5;G3N131		0	123342508	62.67	5.39673e-05	3	1258.75	0.489326	23.9265	2
	GTLVQTKGTGASGSFK	3	4	3	P02253;A7MAZ5;G3N131		0	2.50618e+07	60.04	0.000163388	2	1538.82	-0.120241	22.4104	1
	KAsGPPVSELITK	8	3	2	P02253;A7MAZ5	S3(Phosp)	0	8.43114e+07	57.92	0.000182745	2	1406.73	0.808192	29.9454	1
	kALAAAGYDVEK	4	5	3	P02253;A7MAZ5;G3N131	K1(Acety)	0	0	57.91	0.000140449	2	1277.67	0.940761	26.7276	1
	SGVSLAALKKALAAAGYDVEKNNSR	2	4	3	P02253;A7MAZ5;G3N131		0	1.41549e+07	57.88	0.00114401	4	2533.37	0.591044	42.231	3
	SLVskGTLVQTK	6	3	2	P02253;A7MAZ5	S4(Phosp); K5(DimetR0)	0	15384671	56.6	0.000265485	2	1374.79	3.73936	24.7682	1
	kASGPPVSELITK	16	3	2	P02253;A7MAZ5	K1(Methy)	0	9.57819e+08	55.64	0.000275354	2	1340.78	-0.893528	28.67	1
	AATGEAKPK	6	2	2	P02253;A7MAZ5		0	1.76517e+06	51.89	0.000252062	2	872.484	-0.0368583	10.2306	0
	ASGPPVSELITKAVAASKER	6	3	2	P02253;A7MAZ5		0	2.91951e+07	51.76	0.00230115	3	2011.12	0.657225	39.4111	2
	SGVSLAALKKALAAAGYDVEK	10	4	3	P02253;A7MAZ5;G3N131		0	3.90033e+07	51.54	0.00246106	3	2062.15	0.0299675	43.2512	2
	GTLVQtkGTGASGSFK	1	4	3	P02253;A7MAZ5;G3N131	T6(Phosp); K7(DimetR0)	0	7.71301e+06	51.36	0.00144802	2	1652.86	5.05803	23.0569	1
	IKLGLKSLVSKGTLVQTK	2	3	2	P02253;A7MAZ5		0	1.71615e+07	49.26	0.00147154	3	1913.22	0.0335561	34.2912	3
	GTGASGSFK	12	6	4	P02251;P02253;A7MAZ5;G3N131		0	1.31823e+08	48.66	0.000466295	2	811.393	-1.86021	11.2113	0
	LGLKSLVSK	6	4	3	P02251;P02253;A7MAZ5		0	5.65917e+07	48.58	0.000524887	2	944.614	0.256233	28.4601	1
	LNKKAATGEAKPK	2	2	2	P02253;A7MAZ5		0	432046	48.57	0.00168601	2	1355.8	0.257869	10.7692	2
	LGLkSLVSK	1	4	3	P02251;P02253;A7MAZ5	K4(Acety)	0	6.93226e+06	47.19	0.00100076	2	986.622	-2.97146	34.4969	1
	ERSGVSLAALK	6	4	3	P02253;A7MAZ5;G3N131		0	4.19334e+07	45.34	0.0022092	2	1130.65	1.74364	26.7332	1
	GTGASGSFKLNK	8	4	3	P02253;A7MAZ5;G3N131		0	4.448e+07	44.01	0.00302263	2	1166.62	-0.600922	19.9807	1
	GTGASGSFKLNKK	17	4	3	P02253;A7MAZ5;G3N131		0	7.83638e+06	42.41	0.0063038	2	1294.71	0.307629	15.7257	2
	GTGASGSFKLNKKAATGEAKPK	4	2	2	P02253;A7MAZ5		0	1.92499e+07	40.39	0.0402118	3	2148.18	-0.701494	18.8368	3
	LGLKSLVSKGTLVQTK	2	3	2	P02253;A7MAZ5		0	1.17072e+07	37.08	0.0235551	4	1672.04	0.774709	32.8684	2
	RKASGPPVSELITK	5	3	2	P02253;A7MAZ5		0	1.06261e+08	33.94	0.0528977	3	1482.87	0.942946	26.5676	2
	ALAAAGYDVEKNNSRIK	2	5	3	P02253;A7MAZ5;G3N131		0	8.94808e+06	33.55	0.115427	3	1819.97	-0.408844	24.4741	2
	SGVSLAALkK	1	4	3	P02253;A7MAZ5;G3N131	K9(Acety)	0	6.87178e+06	31.78	0.0397914	2	1015.61	-0.178988	32.1467	1
	RkASGPPVSELITK	4	3	2	P02253;A7MAZ5	K2(Methy)	0	4.31464e+07	29.98	0.127938	3	1496.88	2.68711	26.9859	2
	ASGPPVSELItkAVAASK	2	3	2	P02253;A7MAZ5	T11(Phosp); K12(DimetR0)	0	7.18625e+06	29.01	0.334104	3	1840.02	4.22497	40.2614	1
	LGLkSLVSK	4	4	3	P02251;P02253;A7MAZ5	K4(MethyR0)	0	3.29516e+07	27.38	0.0507298	2	961.647	-1.46212	28.939	1
	kPkkStGAAtPkkAAkK	8	1	1	A7MAZ5	K1(MethyR0); K3(Acety); K4(Acety); T6(Phosp); T10(Phosp); K12(Acety); K13(MethyR0); K16(Methy)	0	5.57625e+08	26.78	0.814599	2	2074.12	-6.89329	22.8519	5
	LGLkSLVSK	2	4	3	P02251;P02253;A7MAZ5	K4(DimetR0)	0	1.55304e+07	25.48	0.0566278	2	978.682	-0.672087	29.0675	1
	AAkPkAtkAkKAVskk	2	1	1	A7MAZ5	K3(Methy); K5(Dimet); T7(Phosp); K8(Acety); K10(Acety); S14(Phosp); K15(Methy); K16(Methy)	0	6.38065e+06	24.88	1.02272	4	1969.12	7.90132	47.4066	5
	LGLksLVSK	2	4	3	P02251;P02253;A7MAZ5	K4(DimetR0); S5(Phosp)	0	7.36241e+06	22.48	0.350826	2	1058.66	6.80142	29.1828	1
	ASGPPVSELITkAVAASK	2	3	2	P02253;A7MAZ5	K12(Methy)	0	6.1344e+06	21.84	1.42547	2	1739.99	-0.909339	40.0541	1
	ALAAAGYDVEkNNsR	1	5	3	P02253;A7MAZ5;G3N131	K11(DimetR0); S14(Phosp)	0	2.52184e+06	21.3	1.24392	3	1692.83	3.61293	22.4957	1
	RKAsGPPVSELITK	5	3	2	P02253;A7MAZ5	S4(Phosp)	0	3.41199e+07	20.56	1.55367	2	1562.83	0.620065	28.4048	2
	kTPKkVkkPAAAAGtKK	4	1	1	A7MAZ5	K1(MethyR0); K5(Acety); K7(Acety); K8(Methy); T15(Phosp)	0	4.72676e+07	18.67	2.91222	2	1947.16	1.99951	44.9759	5
	KAATGEAKPK	1	2	2	P02253;A7MAZ5		0	663306	18.15	0.844395	2	1000.58	0.0905627	10.3831	1
	SEtAPVAPAAPAPAEK	1	1	1	A7MAZ5	T3(Phosp)	0	5.22601e+06	17.93	1.63722	2	1586.73	-8.15596	25.0211	0
	VKkPAAAAGtkkVAk	1	1	1	A7MAZ5	K3(MethyR0); T10(Phosp); K11(Acety); K12(DimetR0); K15(DimetR0)	0	923511	17.31	1.39242	3	1675.08	-2.50785	61.3161	3
	KPTksPAKAK	1	1	1	A7MAZ5	K4(Methy); S5(Phosp)	0	0	16.48	1.60133	2	1149.64	1.39467	57.4127	2
	ksTGAATPkKAAKktPkk	1	1	1	A7MAZ5	K1(Dimet); S2(Phosp); K9(Dimet); K14(Acety); T15(Phosp); K17(Acety); K18(Dimet)	0	4325772	16.44	9.74113	4	2169.19	2.796	40.7452	6
	KPkKsTGAATPK	2	1	1	A7MAZ5	K3(Methy); S5(Phosp)	0	6.02144e+06	15.52	2.75353	2	1307.72	6.689	16.771	2
	kStGAATPkkAAKkTPk	1	1	1	A7MAZ5	K1(Dimet); T3(Phosp); K9(MethyR0); K10(Acety); K14(MethyR0); K17(MethyR0)	0	1.91924e+06	14.89	7.18412	2	1914.14	-4.15957	49.3344	5
	AKAAKPKkPTkSPAkAkAPKPK	1	1	1	A7MAZ5	K8(Methy); K11(Acety); K15(Acety); K17(Methy)	0	5.91606e+06	14.62	5.64137	3	2383.48	-5.1111	48.545	5
	kPkkSTGAAtPkkAAkk	2	1	1	A7MAZ5	K1(Dimet); K3(Methy); K4(MethyR0); T10(Phosp); K12(MethyR0); K13(Dimet); K16(Dimet); K17(Dimet)	0	3.62166e+06	14.38	4.38252	4	1980.25	-6.0552	46.9138	5
	ATkAkkAVskkK	3	1	1	A7MAZ5	K3(Acety); K5(Methy); K6(Methy); S9(Phosp); K10(Dimet); K11(Methy)	0	2.08997e+07	13.86	5.35317	2	1479.89	-9.17557	35.3521	5
	kstGAAtPkkAAkktPKK	1	1	1	A7MAZ5	K1(Methy); S2(Phosp); T3(Phosp); T7(Phosp); K9(Dimet); K10(Acety); K13(DimetR0); K14(DimetR0); T15(Phosp)	0	3.3861e+06	13.85	23.0156	4	2313.19	-0.069172	39.4235	6
	kSTGAATPkkAAk	1	1	1	A7MAZ5	K1(Acety); K9(Dimet); K10(Dimet); K13(Acety)	0	1.82741e+07	13.44	4.68749	2	1398.83	-2.2337	28.8173	3
	kTPKkVkkPAAAAGtKk	1	1	1	A7MAZ5	K1(Dimet); K5(Acety); K7(Acety); K8(Acety); T15(Phosp); K17(Dimet)	0	988654	13.23	13.3332	2	2014.17	-4.58199	51.2686	5
	KPKkstGAATPKk	2	1	1	A7MAZ5	K4(Methy); S5(Phosp); T6(Phosp); K13(Acety)	0	2.48006e+09	12.85	8.03881	2	1557.79	8.70107	27.757	3
	stGAAtPkkAAKktPkk	1	1	1	A7MAZ5	S1(Phosp); T2(Phosp); T6(Phosp); K8(Dimet); K9(Acety); K13(Dimet); T14(Phosp); K16(Dimet); K17(Dimet)	0	2.80179e+07	12.84	17.8957	2	2187.04	-0.40357	36.1442	5
	GKKAGAAkPkkAAGAAkkPk	1	1	1	A7MAZ5	K8(Dimet); K10(Methy); K11(Acety); K17(Acety); K18(Acety); K20(Acety)	0	3.63825e+08	12.73	11.4187	3	2116.29	-4.94894	44.6072	5
	KtPkkVkkPAAAAGtKK	1	1	1	A7MAZ5	T2(Phosp); K4(DimetR0); K5(Methy); K7(Dimet); K8(Methy); T15(Phosp)	0	2.58958e+06	12.08	13.4326	2	2002.2	6.69223	47.6275	5
	kStGAAtPKKAAKktPkk	1	1	1	A7MAZ5	K1(MethyR0); T3(Phosp); T7(Phosp); K14(DimetR0); T15(Phosp); K17(DimetR0); K18(Methy)	0	885756	11.83	29.4117	3	2180.2	-8.85765	52.2087	6
	kSTGAAtPkKAAkk	1	1	1	A7MAZ5	K1(Dimet); T7(Phosp); K9(Methy); K13(Acety); K14(Acety)	0	572631	11.81	10.7874	3	1592.88	4.65908	11.2167	4
	ktPkkVkkPAAAAGtk	1	1	1	A7MAZ5	K1(MethyR0); T2(Phosp); K4(Dimet); K5(Dimet); K7(Dimet); K8(Dimet); T15(Phosp); K16(Methy)	0	649193	11.75	15.6392	3	1927.14	0.642534	46.6273	4
	AKAPkPkAAkPkAAkPkAtk	1	1	1	A7MAZ5	K5(MethyR0); K7(Acety); K10(Acety); K12(Acety); K15(Methy); K17(DimetR0); T19(Phosp); K20(Methy)	0	3.57602e+06	11.66	11.6236	4	2315.43	2.38212	49.0326	4
	kAAKkTPkkVKKPAAAAGtK	1	1	1	A7MAZ5	K1(Methy); K5(Acety); K8(Acety); K9(Acety); T19(Phosp)	0	7.58303e+06	11.63	25.0746	3	2242.3	-1.46346	46.2754	6
	KVkkPAAAAGtkk	1	1	1	A7MAZ5	K3(Dimet); K4(Acety); T11(Phosp); K12(Dimet); K13(Methy)	0	5.08743e+06	11.62	8.94904	2	1489.88	-6.88106	48.9614	3
	VkkPAAAAGtkKVAKSPK	1	1	1	A7MAZ5	K2(MethyR0); K3(Dimet); T10(Phosp); K11(Acety)	0	6.83162e+06	11.26	16.0445	3	1947.16	2.24286	46.9474	4
	kstGAAtPkkAAkk	1	1	1	A7MAZ5	K1(Methy); S2(Phosp); T3(Phosp); T7(Phosp); K9(MethyR0); K10(Methy); K13(Acety); K14(Methy)	0	3.8918e+06	10.75	14.3205	2	1727.84	2.61548	36.6365	4
	kPAAAAGtKk	1	1	1	A7MAZ5	K1(Methy); T8(Phosp); K10(Dimet)	0	257610	10.72	4.24037	2	1064.59	-0.300709	15.9884	1
	GTGASGsFkLNk	1	4	3	P02253;A7MAZ5;G3N131	S7(Phosp); K9(MethyR0); K12(MethyR0)	0	1.00613e+06	10.58	7.15737	2	1280.65	-3.32392	19.8816	1
	kPAAAAGtkkVAkSPKKAk	1	1	1	A7MAZ5	K1(Acety); T8(Phosp); K9(Methy); K10(DimetR0); K13(DimetR0); K19(Dimet)	0	1.06253e+06	10.58	11.0248	4	2112.33	-5.22496	47.9755	5
	AAkPKAtKAkkAVsKKk	1	1	1	A7MAZ5	K3(Methy); T7(Phosp); K10(Dimet); K11(Dimet); S14(Phosp); K17(DimetR0)	0	7.36783e+06	10.48	19.0355	4	2047.23	-4.9657	46.2859	6
	VAksPkKAk	1	3	3	P02251;P02253;A7MAZ5	K3(MethyR0); S4(Phosp); K6(Methy); K9(Acety)	0	8.1226e+07	10.38	5.31408	2	1109.66	9.84825	35.0026	3
	kPKksTGAAtPK	1	1	1	A7MAZ5	K1(DimetR0); K4(Dimet); S5(Phosp); T10(Phosp)	0	1.77721e+06	10.25	12.3153	2	1435.75	-4.20537	46.2496	2
	kSTGAAtPkkAAkK	1	1	1	A7MAZ5	K1(MethyR0); T7(Phosp); K9(Methy); K10(Methy); K13(Acety)	0	5.62163e+06	10.23	14.4492	2	1553.89	1.53401	28.2104	4
G3N131	Histone H1.1 OS=Bos taurus GN=HIST1H1A PE=1 SV=1 - [H11_BOVIN]	8995.98	76.61	2	5	49	486	6.87808e+09	218	22.0871	10.9312
	Sequence	# PSMs	# Proteins	# Protein Groups	Protein Group Accessions	Modifications	ΔCn	Area	IonScore	Exp Value	Charge	MH+ [Da]	ΔM [ppm]	RT [min]	# Missed Cleavages
	KKPAGPSVSELIVQAVSSSK	44	1	1	G3N131		0	7.59042e+08	108.68	4.62594e-09	2	2012.14	-0.127211	39.9923	1
	KPAGPSVSELIVQAVSSSK	18	1	1	G3N131		0	3.22507e+08	107.84	4.74895e-09	2	1884.05	1.48356	41.4326	0
	KALAAAGYDVEKNNSR	10	5	3	P02253;A7MAZ5;G3N131		0	9.45238e+07	103.46	9.66776e-09	2	1706.88	-0.914263	20.17	2
	ALAAAGYDVEKNNSR	18	5	3	P02253;A7MAZ5;G3N131		0	1.12855e+09	94.07	6.00149e-08	2	1578.79	0.0162617	22.1822	1
	KALAAAGYDVEK	31	5	3	P02253;A7MAZ5;G3N131		0	1.05078e+09	93.23	4.37308e-08	2	1235.66	-0.262187	22.6274	1
	SGVSLAALK	22	4	3	P02253;A7MAZ5;G3N131		0	5.95688e+09	84.51	2.11159e-07	2	845.509	0.289385	29.0688	0
	ALAAAGYDVEK	154	5	3	P02253;A7MAZ5;G3N131		0	11629596032	79.23	7.27736e-07	2	1107.57	2.13157	23.9062	0
	SGVSLAALKK	28	4	3	P02253;A7MAZ5;G3N131		0	3.04776e+09	76.83	1.27503e-06	2	973.607	2.885	25.3844	1
	GTLVQTkGTGASGSFK	1	4	3	P02253;A7MAZ5;G3N131	K7(Acety)	0	6.5047e+06	75.38	5.52523e-06	2	1580.83	1.23434	27.1144	1
	VASVDAKPTATK	10	1	1	G3N131		0	5.54619e+08	71.74	6.18638e-06	2	1187.66	-0.581129	12.3141	0
	KVASVDAKPTATK	14	1	1	G3N131		0	175338554	71.24	7.86573e-06	2	1315.76	-0.802347	11.8201	1
	ERSGVSLAALKK	7	4	3	P02253;A7MAZ5;G3N131		0	123342508	62.67	5.39673e-05	3	1258.75	0.489326	23.9265	2
	GTLVQTKGTGASGSFK	3	4	3	P02253;A7MAZ5;G3N131		0	2.50618e+07	60.04	0.000163388	2	1538.82	-0.120241	22.4104	1
	kALAAAGYDVEK	4	5	3	P02253;A7MAZ5;G3N131	K1(Acety)	0	0	57.91	0.000140449	2	1277.67	0.940761	26.7276	1
	SGVSLAALKKALAAAGYDVEKNNSR	2	4	3	P02253;A7MAZ5;G3N131		0	1.41549e+07	57.88	0.00114401	4	2533.37	0.591044	42.231	3
	SLVGKGTLVQTK	6	1	1	G3N131		0	9.05703e+06	56	0.000219413	2	1230.74	-1.22804	24.3368	1
	SGVSLAALKKALAAAGYDVEK	10	4	3	P02253;A7MAZ5;G3N131		0	3.90033e+07	51.54	0.00246106	3	2062.15	0.0299675	43.2512	2
	GTLVQtkGTGASGSFK	1	4	3	P02253;A7MAZ5;G3N131	T6(Phosp); K7(DimetR0)	0	7.71301e+06	51.36	0.00144802	2	1652.86	5.05803	23.0569	1
	GTGASGSFK	12	6	4	P02251;P02253;A7MAZ5;G3N131		0	1.31823e+08	48.66	0.000466295	2	811.393	-1.86021	11.2113	0
	ERSGVSLAALK	6	4	3	P02253;A7MAZ5;G3N131		0	4.19334e+07	45.34	0.0022092	2	1130.65	1.74364	26.7332	1
	GTGASGSFKLNK	8	4	3	P02253;A7MAZ5;G3N131		0	4.448e+07	44.01	0.00302263	2	1166.62	-0.600922	19.9807	1
	KPAGPSVSELIVQAVSSSKER	5	1	1	G3N131		0	9.31299e+06	43.11	0.0209045	3	2169.19	-0.0881843	40.5383	1
	GTGASGSFKLNKK	17	4	3	P02253;A7MAZ5;G3N131		0	7.83638e+06	42.41	0.0063038	2	1294.71	0.307629	15.7257	2
	kPkAVKPKkVAksPAk	2	1	1	G3N131	K1(MethyR0); K3(Dimet); K9(Acety); K12(Acety); S13(Phosp); K16(Acety)	0	510716	38.91	0.0277365	2	1956.17	-7.09815	50.6497	4
	ALAAAGYDVEKNNSRIK	2	5	3	P02253;A7MAZ5;G3N131		0	8.94808e+06	33.55	0.115427	3	1819.97	-0.408844	24.4741	2
	SGVSLAALkK	1	4	3	P02253;A7MAZ5;G3N131	K9(Acety)	0	6.87178e+06	31.78	0.0397914	2	1015.61	-0.178988	32.1467	1
	kSskSPkkPkAVkPkK	2	1	1	G3N131	K1(MethyR0); S3(Phosp); K4(Acety); K7(Acety); K8(Acety); K10(Acety); K13(Dimet); K15(Dimet)	0	2.11348e+07	25.1	0.688672	2	2087.26	6.80008	46.8645	5
	kSsKsPkkPK	1	1	1	G3N131	K1(MethyR0); S3(Phosp); S5(Phosp); K7(DimetR0); K8(DimetR0)	0	2.76893e+06	23.7	0.490353	2	1359.8	-0.627142	13.9836	3
	kASGAAAAKksVkTPk	1	1	1	G3N131	K1(Methy); K10(Acety); S11(Phosp); K13(Acety); K16(Acety)	0	5.08764e+06	22.39	1.38424	3	1762.95	1.47448	39.2196	4
	ALAAAGYDVEkNNsR	1	5	3	P02253;A7MAZ5;G3N131	K11(DimetR0); S14(Phosp)	0	2.52184e+06	21.3	1.24392	3	1692.83	3.61293	22.4957	1
	KSsksPkkPK	2	1	1	G3N131	S3(Phosp); K4(MethyR0); S5(Phosp); K7(DimetR0); K8(Methy)	0	9.55145e+06	20.8	0.78061	2	1339.76	9.07776	35.0795	3
	kPkkAsGAAAAkksVk	1	1	1	G3N131	K1(DimetR0); K3(Acety); K4(Acety); S6(Phosp); K12(Acety); K13(Acety); S14(Phosp); K16(Methy)	0	2.4147e+08	17.9	5.25061	2	1946.02	-9.15779	24.7273	4
	kARKsVLtKKSSkSPk	1	1	1	G3N131	K1(Methy); S5(Phosp); T8(Phosp); K13(Methy); K16(Acety)	0	6.31733e+08	17.33	6.57785	2	2003.07	-4.14992	41.5108	6
	kARkSVLTkKsskSPk	1	1	1	G3N131	K1(Acety); K4(Methy); K9(Dimet); S11(Phosp); S12(Phosp); K13(DimetR0); K16(DimetR0)	0	2.28017e+06	16.99	5.18164	2	2085.24	2.51946	48.238	6
	kSSksPkkPkAVkPkk	1	1	1	G3N131	K1(Acety); K4(Acety); S5(Phosp); K7(Acety); K8(MethyR0); K10(Dimet); K13(Dimet); K15(Dimet); K16(Methy)	0	4.53836e+06	16.81	4.19712	3	2087.27	-5.14467	45.56	5
	tPKkARKsVLtkk	1	1	1	G3N131	T1(Phosp); K4(Methy); S8(Phosp); T11(Phosp); K12(DimetR0); K13(MethyR0)	0	1.86831e+06	16.31	5.71261	2	1789.98	1.00433	47.4702	5
	ksVLtkksskSPkkPk	1	1	1	G3N131	K1(DimetR0); S2(Phosp); T5(Phosp); K6(Methy); K7(Methy); S8(Phosp); S9(Phosp); K10(MethyR0); K13(Dimet); K14(MethyR0); K16(MethyR0)	0	1.17348e+07	14.99	14.9398	4	2232.22	3.46458	36.4377	5
	KVAksPAk	1	1	1	G3N131	K4(DimetR0); S5(Phosp); K8(Dimet)	0	3.04082e+06	14.98	1.32634	2	970.604	7.86357	24.2599	2
	tkVTSAsKKPKkAsGAAAAk	1	1	1	G3N131	T1(Phosp); K2(Dimet); S7(Phosp); K12(Methy); S14(Phosp); K20(Dimet)	0	7.75384e+06	14.55	16.2573	3	2240.12	-1.18681	35.7326	4
	VAksPAk	1	1	1	G3N131	K3(Methy); S4(Phosp); K7(Dimet)	0	7.51231e+06	14.04	1.32735	2	822.447	-1.90929	15.4862	1
	kARkSVLtKKsSkSPk	1	1	1	G3N131	K1(Dimet); K4(Dimet); T8(Phosp); S11(Phosp); K13(MethyR0); K16(DimetR0)	0	1.21056e+07	13.87	9.39162	2	2040.22	8.36357	51.5519	6
	tPKkARksVLTkkSSK	1	1	1	G3N131	T1(Phosp); K4(MethyR0); K7(Dimet); S8(Phosp); K12(DimetR0); K13(Methy)	0	4.85102e+06	13.63	10.09	2	2040.22	7.2817	51.7202	6
	VtkPkTAAKPKkAAPK	1	1	1	G3N131	T2(Phosp); K3(Dimet); K5(Dimet); K12(Methy)	0	2.6521e+06	13.44	6.38812	4	1814.12	9.35351	45.9131	3
	kARkSVLTkkssksPk	2	1	1	G3N131	K1(MethyR0); K4(Dimet); K9(Acety); K10(Dimet); S11(Phosp); S12(Phosp); K13(MethyR0); S14(Phosp); K16(DimetR0)	0	2.0191e+09	13.32	19.7129	2	2179.22	3.06169	50.7987	6
	TkVtsAskkPKk	1	1	1	G3N131	K2(DimetR0); T4(Phosp); S5(Phosp); S7(Phosp); K8(MethyR0); K9(Methy); K12(Dimet)	0	1.08914e+06	13.25	8.29907	2	1635.85	-5.967	49.7635	3
	VATkTKVtsAskkPkk	1	1	1	G3N131	K4(Dimet); T8(Phosp); S9(Phosp); S11(Phosp); K12(MethyR0); K13(Acety); K15(Acety); K16(Dimet)	0	6.55946e+07	13.18	18.1829	3	2099.07	-3.45996	31.8583	4
	VTSAskkPkkASGAAAAkkSVk	1	1	1	G3N131	S5(Phosp); K6(Acety); K7(MethyR0); K9(Dimet); K10(Dimet); K18(Acety); K19(Acety); K22(Acety)	0	1.4167e+07	13.15	22.773	4	2464.41	6.13382	33.3574	5
	kAsGAAAAkkSVKtPkkAR	1	1	1	G3N131	K1(Acety); S3(Phosp); K9(Methy); K10(Methy); T14(Phosp); K16(DimetR0); K17(MethyR0)	0	5.33092e+08	13.08	20.9363	3	2179.22	-9.51791	50.8468	6
	VAtKTkVTSAsK	1	1	1	G3N131	T3(Phosp); K6(Dimet); S11(Phosp)	0	2.01512e+06	12.86	4.79045	3	1408.68	-0.30058	16.9765	2
	KsVLtKkSSksPkkPkAVkPk	1	1	1	G3N131	S2(Phosp); T5(Phosp); K7(MethyR0); K10(MethyR0); S11(Phosp); K13(MethyR0); K14(MethyR0); K16(Acety); K19(Acety); K21(Acety)	0	7.07484e+07	12.68	39.5461	4	2728.53	-2.6676	40.2784	6
	ksSkSPkKPk	1	1	1	G3N131	K1(Dimet); S2(Phosp); K4(Methy); K7(MethyR0); K10(Dimet)	0	2.20518e+06	12.65	4.02277	2	1281.77	0.464263	20.8352	3
	sVLtkksSKSPKkPk	1	1	1	G3N131	S1(Phosp); T4(Phosp); K5(Dimet); K6(MethyR0); S7(Phosp); K13(Acety); K15(Acety)	0	2.89877e+07	12.51	19.4403	3	2012.01	1.45415	22.7528	4
	tKVtSASkKPKkAsGAAAAk	2	1	1	G3N131	T1(Phosp); T4(Phosp); K8(Dimet); K12(Methy); S14(Phosp); K20(Methy)	0	2.43462e+07	12.47	24.9287	3	2226.1	-1.35205	38.1818	4
	tkVTSAsKKPKkAsGAAAAK	2	1	1	G3N131	T1(Phosp); K2(Dimet); S7(Phosp); K12(Methy); S14(Phosp)	0	4.95065e+07	12.35	24.0263	3	2212.09	-2.33991	35.7454	4
	TPkkARkSVLTkkssk	1	1	1	G3N131	K3(Methy); K4(Methy); K7(Acety); K12(Methy); K13(Methy); S14(Phosp); S15(Phosp); K16(MethyR0)	0	8.60559e+06	12.25	20.9018	4	2062.15	-4.11591	43.3243	6
	kSsksPkkPkAVkPk	1	1	1	G3N131	K1(Acety); S3(Phosp); K4(Acety); S5(Phosp); K7(Acety); K8(Dimet); K10(Methy); K13(Dimet); K15(Dimet)	0	1.16311e+07	12.22	20.057	4	2022.14	9.37444	24.3606	4
	VAksPAk	2	1	1	G3N131	K3(DimetR0); S4(Phosp); K7(Dimet)	0	5.87401e+07	12.07	1.80983	2	842.51	9.27564	23.609	1
	SVLTkKsSk	2	1	1	G3N131	K5(Methy); S7(Phosp); K9(Dimet)	0	4.60918e+06	11.95	3.96681	2	1099.61	-2.38317	20.9568	2
	kAsGAAAAkksVkTPKk	1	1	1	G3N131	K1(Acety); S3(Phosp); K9(Acety); K10(DimetR0); S11(Phosp); K13(MethyR0); K17(Acety)	0	1.33469e+06	11.24	25.0027	3	2008.12	9.88152	50.3058	5
	kPkkAsGAAAAKksVKTPk	1	1	1	G3N131	K1(DimetR0); K3(DimetR0); K4(DimetR0); S6(Phosp); K13(Methy); S14(Phosp); K19(Dimet)	0	4.94233e+06	11.17	10.7319	4	2200.38	8.91988	48.212	5
	VtkPktAAkPkkAAPKkk	1	1	1	G3N131	T2(Phosp); K3(Dimet); K5(Methy); T6(Phosp); K9(DimetR0); K11(Acety); K12(DimetR0); K17(Dimet); K18(Dimet)	0	4.28797e+06	11.1	11.0227	4	2288.43	-2.01251	48.8522	5
	KASGAAAAkksVK	1	1	1	G3N131	K9(MethyR0); K10(Dimet); S11(Phosp)	0	0	10.92	8.88792	2	1341.78	4.79077	52.8135	3
	kASGAAAAkkSVktPk	1	1	1	G3N131	K1(Dimet); K9(Dimet); K10(Methy); K13(Acety); T14(Phosp); K16(Dimet)	0	1.92676e+07	10.79	18.4702	4	1763.01	-6.74725	34.3169	4
	sPKkPKAVkPkkVAKSPAk	1	1	1	G3N131	S1(Phosp); K4(DimetR0); K9(Acety); K11(Acety); K12(Acety); K19(MethyR0)	0	3.251e+07	10.77	12.8184	4	2274.42	7.23818	47.4564	5
	GTGASGsFkLNk	1	4	3	P02253;A7MAZ5;G3N131	S7(Phosp); K9(MethyR0); K12(MethyR0)	0	1.00613e+06	10.58	7.15737	2	1280.65	-3.32392	19.8816	1
	ksSkSPKkPkAVkPkk	1	1	1	G3N131	K1(Methy); S2(Phosp); K4(MethyR0); K8(Methy); K10(Methy); K13(Acety); K15(Acety); K16(Methy)	0	1.128e+07	10.3	19.5377	3	2003.2	-9.93894	47.0141	5
	tkVTSASKKPKKASGAAAAk	1	1	1	G3N131	T1(Phosp); K2(Methy); K20(Acety)	0	755302	10.26	35.0336	3	2066.13	-1.6113	50.1242	4
	VTsAskkPK	1	1	1	G3N131	S3(Phosp); S5(Phosp); K6(DimetR0); K7(Dimet)	0	0	10.17	6.63512	2	1167.6	-5.07045	24.6202	1
	KASGAAAAKksVkTPkk	1	1	1	G3N131	K10(Acety); S11(Phosp); K13(Acety); K16(Acety); K17(DimetR0)	0	1.77668e+07	10	27.035	3	1911.09	-1.5213	36.9334	5
P0C0S4	Histone H2A.Z OS=Bos taurus GN=H2AFZ PE=1 SV=2 - [H2AZ_BOVIN]	7941.23	49.22	2	3	16	608	1.65229e+10	128	13.5446	10.5796
	Sequence	# PSMs	# Proteins	# Protein Groups	Protein Group Accessions	Modifications	ΔCn	Area	IonScore	Exp Value	Charge	MH+ [Da]	ΔM [ppm]	RT [min]	# Missed Cleavages
	AGLQFPVGR	249	5	3	P0C0S9;A1A4R1;P0C0S4		0	34267197440	91.14	4.83783e-08	2	944.531	-0.0473636	50.2579	0
	GDEELDSLIK	9	2	1	P0C0S4		0	1.16325e+09	76.09	1.27693e-06	2	1118.56	-1.05244	32.6937	0
	ATIAGGGVIPHIHK	16	2	1	P0C0S4		0	1.0588e+09	75.35	3.45132e-06	2	1370.79	-0.289402	27.5808	0
	AGGkAGkDSGkAK	2	2	1	P0C0S4	K4(Acety); K7(Acety); K11(Acety)	0	3.03728e+06	57.16	0.000167117	2	1300.69	-0.393721	12.1902	3
	HLQLAIR	315	5	3	P0C0S9;A1A4R1;P0C0S4		0	1.41384e+10	42.09	0.00142453	2	850.526	0.314247	27.552	0
	AGGKAGkDSGKAktk	3	1	1	P0C0S4	K7(MethyR0); K13(Methy); T14(Phosp); K15(Methy)	0	5.0318e+07	17.92	3.05517	3	1528.82	-3.9948	31.3437	4
	mAGGkAGkDsGkAK	2	2	1	P0C0S4	M1(Oxida); K5(Methy); K8(DimetR0); S10(Phosp); K12(Acety)	0	6.30682e+06	16.64	2.75298	2	1491.74	-4.22248	35.4854	3
	AGGKAGkDSGk	1	2	1	P0C0S4	K7(Methy); K11(Dimet)	0	3.66546e+06	15.88	1.36731	2	1017.57	4.16908	17.5451	2
	AGkDsGkAkTkAVsR	1	1	1	P0C0S4	K3(Dimet); S5(Phosp); K7(Acety); K9(MethyR0); K11(Methy); S14(Phosp)	0	4.45702e+06	13.95	8.46713	4	1764.89	1.52908	20.4004	4
	MAGGkAGkDsGk	1	2	1	P0C0S4	K5(Acety); K8(Dimet); S10(Phosp); K12(MethyR0)	0	1.29921e+07	11.93	4.37626	2	1273.61	4.03555	32.9759	2
	mAGGKAGKDSGkAktk	1	1	1	P0C0S4	M1(Oxida); K12(Acety); K14(Acety); T15(Phosp); K16(Acety)	0	9.30504e+06	11.6	12.1762	3	1756.84	7.24894	29.3696	4
	AGGkAGkDsGkAkTK	1	1	1	P0C0S4	K4(Dimet); K7(Methy); S9(Phosp); K11(DimetR0); K13(DimetR0)	0	1.38246e+07	11.53	9.37547	3	1593.95	3.07134	41.0325	4
	mAGGkAGkDSGKAKtKAVSR	1	1	1	P0C0S4	M1(Oxida); K5(Acety); K8(Dimet); T15(Phosp)	0	2.02917e+06	11.32	28.3355	3	2114.06	-7.93373	49.5071	5
	AGkDsGkAk	1	2	1	P0C0S4	K3(Acety); S5(Phosp); K7(DimetR0); K9(Dimet)	0	0	11.31	3.9421	2	1045.56	7.1539	56.9333	2
	HLQLAIRGDEELDSLIK	1	2	1	P0C0S4		0	1.45252e+06	10.8	28.2093	3	1950.07	0.6386	63.0769	1
	AGkDsGkAktk	1	1	1	P0C0S4	K3(MethyR0); S5(Phosp); K7(Dimet); K9(MethyR0); T10(Phosp); K11(Dimet)	0	1.94947e+07	10.64	8.06022	2	1340.69	2.41752	31.4212	3
	AGGkAGkDsGKAk	1	2	1	P0C0S4	K4(Dimet); K7(MethyR0); S9(Phosp); K13(Methy)	0	915684	10.4	9.66275	3	1313.7	-3.6997	17.0987	3
	mAGGkAGkDSGkAktkAVsRSQR	1	1	1	P0C0S4	M1(Oxida); K5(Acety); K8(DimetR0); K12(Methy); K14(DimetR0); T15(Phosp); K16(Acety); S19(Phosp)	0	2.65732e+06	10.18	84.4752	2	2661.36	-4.25131	46.4579	6
	AGGkAGkDsGKAKtk	1	1	1	P0C0S4	K4(Methy); K7(MethyR0); S9(Phosp); T14(Phosp); K15(Acety)	0	5.46885e+06	10.09	14.2124	2	1636.79	0.0900306	22.7089	4
P84227	Histone H3.2 OS=Bos taurus PE=1 SV=2 - [H32_BOVIN]	3795.34	83.82	2	1	19	541	8.16904e+09	136	15.3785	11.2681
	Sequence	# PSMs	# Proteins	# Protein Groups	Protein Group Accessions	Modifications	ΔCn	Area	IonScore	Exp Value	Charge	MH+ [Da]	ΔM [ppm]	RT [min]	# Missed Cleavages
	FQSSAVmALQEASEAYLVGLFEDTNLcAIHAK	5	1	1	P84227	M7(Oxida); C27(Carba)	0	1.04691e+07	119	2.35129e-09	3	3529.7	-0.165308	56.4128	0
	SAPATGGVKKPHR	3	2	2	P68432;P84227		0	10403284	81.9	6.17245e-07	2	1305.73	-3.52668	10.926	1
	SAPATGGVkKPHR	15	2	2	P68432;P84227	K9(Methy)	0	9.78914e+07	72.06	6.80797e-06	2	1319.75	-3.51272	10.9287	1
	STELLIR	109	4	3	P68432;P84227;Q5E9F8		0	9000094154	69.74	6.07821e-06	2	831.494	0.262951	29.2013	0
	SAPATGGVkKPHR	9	2	2	P68432;P84227	K9(Dimet)	0	1.61696e+08	66.03	2.56444e-05	2	1333.77	-2.29725	10.8698	1
	kSTGGkAPR	9	4	3	P68432;P84227;Q5E9F8	K1(Dimet); K6(Acety)	0	4.90665e+06	63.49	1.86473e-05	2	971.563	-0.770616	9.98712	2
	KQLATkAAR	11	3	3	P68432;P84227;Q5E9F8	K6(Acety)	0	2.97228e+08	62.42	2.96708e-05	2	1028.62	-0.720745	12.1607	2
	kSTGGkAPR	4	4	3	P68432;P84227;Q5E9F8	K1(Methy); K6(Acety)	0	2.54796e+06	60.02	3.74272e-05	2	957.547	-1.08494	9.63608	2
	FQSSAVMALQEAsEAYLVGLFEDTNLcAIHAK	2	1	1	P84227	S13(Phosp); C27(Carba)	0	6.41803e+06	56.05	0.00404043	3	3593.66	-2.87133	50.3476	0
	kSAPATGGVK	8	2	2	P68432;P84227	K1(Methy)	0	4.36564e+07	54.4	0.000229284	2	929.541	-0.751142	10.5485	1
	kSAPATGGVK	10	2	2	P68432;P84227	K1(Dimet)	0	5.98959e+07	53.59	0.000195354	2	943.557	0.0850401	10.4314	1
	EIAQDFkTDLR	19	4	3	P68432;P84227;Q5E9F8	K7(Methy)	0	1.04387e+09	52.58	0.000577473	2	1349.71	-0.66798	28.58	1
	STGGkAPR	8	4	3	P68432;P84227;Q5E9F8	K5(Acety)	0	2.58851e+06	51.52	0.000175469	2	815.437	-0.114114	10.366	1
	kSAPATGGVkKPHR	20	2	2	P68432;P84227	K1(Dimet); K10(Dimet)	0	1.42549e+08	51.22	0.000907998	2	1489.89	-6.59323	11.0895	2
	YQKSTELLIR	6	3	3	P68432;P84227;Q5E9F8		0	2.99361e+07	49.96	0.000886124	2	1250.71	1.09235	26.398	1
	KSAPATGGVK	8	2	2	P68432;P84227		0	5.30471e+06	48.78	0.000587345	2	915.526	-0.128779	10.2632	1
	kSAPATGGVkKPHR	29	2	2	P68432;P84227	K1(Methy); K10(Dimet)	0	1.7875e+08	48.11	0.00200806	2	1475.87	-7.05923	10.9916	2
	QLATkAAR	12	3	3	P68432;P84227;Q5E9F8	K5(Acety)	0	1.31574e+08	47.76	0.000658253	2	900.526	-0.214053	14.3239	1
	KSTGGkAPR	4	4	3	P68432;P84227;Q5E9F8	K6(Acety)	0	1.70132e+06	46.8	0.000803334	2	943.53	-1.71508	8.26509	2
	kSAPATGGVkKPHR	24	2	2	P68432;P84227	K1(Methy); K10(Methy)	0	5.19535e+07	45.42	0.00331575	2	1461.86	-4.86204	11.1646	2
	EIAQDFKTDLR	16	4	3	P68432;P84227;Q5E9F8		0	1.41583e+09	45.19	0.00314345	2	1335.69	-0.103433	28.4808	1
	VTImPKDIQLAR	13	3	3	P68432;P84227;Q5E9F8	M4(Oxida)	0	1.00142e+08	44.53	0.00403288	3	1400.79	0.707254	29.75	1
	EIAQDFK	40	5	3	P68432;P84227;Q5E9F8		0	2.63529e+09	43.18	0.0013752	2	850.431	0.619183	21.6698	0
	STELLIRKLPFQR	1	4	3	P68432;P84227;Q5E9F8		0	2.38734e+07	40.9	0.0118673	3	1600.95	0.871856	36.0599	2
	eIAQDFK	13	5	3	P68432;P84227;Q5E9F8	N-Term(Glu->)	0	4.75404e+08	37.33	0.00404065	2	832.421	0.779126	21.2919	0
	STELLIRK	3	4	3	P68432;P84227;Q5E9F8		0	36692121	36.6	0.0123499	2	959.589	0.228583	23.3206	1
	EIAQDFkTDLR	14	4	3	P68432;P84227;Q5E9F8	K7(Dimet)	0	1.42798e+08	35.36	0.0319306	2	1363.72	-2.01481	28.7981	1
	FQSSAVmALQEASEAYLVGLFEDtNLcAIHAK	4	1	1	P84227	M7(Oxida); T24(Phosp); C27(Carba)	0	5.45486e+07	34.54	0.532755	3	3609.65	-3.64914	49.9561	0
	eIAQDFkTDLR	2	4	3	P68432;P84227;Q5E9F8	N-Term(Glu->); K7(Methy)	0	49334727	33.02	0.0515597	3	1331.7	0.0690664	28.5169	1
	RYQKSTELLIR	3	3	3	P68432;P84227;Q5E9F8		0	1.21965e+07	32.5	0.0694773	3	1406.81	1.10259	24.6895	2
	YRPGTVALR	84	5	3	P68432;P84227;Q5E9F8		0	12871724880	31.02	0.0496942	2	1032.6	1.38464	22.8843	0
	kSAPATGGVK	6	2	2	P68432;P84227	K1(Acety)	0	3.73254e+06	30.21	0.0409702	2	957.537	0.131924	12.8103	1
	eIAQDFKTDLR	8	4	3	P68432;P84227;Q5E9F8	N-Term(Glu->)	0	2.42297e+08	27.19	0.188407	2	1317.68	-0.151229	32.8769	1
	kSAPATGGVkKPHR	7	2	2	P68432;P84227	K1(Acety); K10(Dimet)	0	6.34108e+06	22.83	0.858408	3	1503.88	0.12549	11.9492	2
	SAPATGGVkkPHR	3	2	2	P68432;P84227	K9(Methy); K10(Dimet)	0	33101462	19.5	1.13492	2	1347.78	-3.56436	10.9213	1
	RYQkStELLIR	2	3	3	P68432;P84227;Q5E9F8	K4(MethyR0); T6(Phosp)	0	6.17851e+06	17.42	2.59293	2	1503.81	-2.33865	43.3689	2
	RVTImPK	2	3	3	P68432;P84227;Q5E9F8	M5(Oxida)	0	1.88877e+08	16.41	0.937096	2	860.502	0.159988	12.7276	1
	EIAQDFk	1	5	3	P68432;P84227;Q5E9F8	K7(Methy)	0	5.62027e+06	15.53	0.972646	2	864.446	-0.344596	21.3934	0
	RVTIMPK	1	3	3	P68432;P84227;Q5E9F8		0	9.07194e+07	15.4	1.62083	2	844.507	-0.216207	20.7429	1
	kSAPATGGVKKPHR	1	2	2	P68432;P84227	K1(Methy)	0	1.3262e+06	14.06	4.39959	3	1447.85	-0.976478	10.846	2
	kSAPATGGVk	1	2	2	P68432;P84227	K1(Acety); K10(Methy)	0	0	12.06	3.29819	2	971.547	-4.80205	10.6475	1
	kstGGkAPRKQLATk	1	3	3	P68432;P84227;Q5E9F8	K1(Acety); S2(Phosp); T3(Phosp); K6(MethyR0); K15(Dimet)	0	0	11.17	19.2257	3	1817.94	-2.63594	51.5747	4
P68432	Histone H3.1 OS=Bos taurus PE=1 SV=2 - [H31_BOVIN]	3729.21	83.82	2	1	19	538	8.16904e+09	136	15.3945	11.1216
	Sequence	# PSMs	# Proteins	# Protein Groups	Protein Group Accessions	Modifications	ΔCn	Area	IonScore	Exp Value	Charge	MH+ [Da]	ΔM [ppm]	RT [min]	# Missed Cleavages
	FQSSAVmALQEAcEAYLVGLFEDTNLcAIHAK	8	1	1	P68432	M7(Oxida); C13(Carba); C27(Carba)	0	2.88683e+07	105.08	5.68864e-08	3	3602.7	0.558808	55.2956	0
	SAPATGGVKKPHR	3	2	2	P68432;P84227		0	10403284	81.9	6.17245e-07	2	1305.73	-3.52668	10.926	1
	SAPATGGVkKPHR	15	2	2	P68432;P84227	K9(Methy)	0	9.78914e+07	72.06	6.80797e-06	2	1319.75	-3.51272	10.9287	1
	STELLIR	109	4	3	P68432;P84227;Q5E9F8		0	9000094154	69.74	6.07821e-06	2	831.494	0.262951	29.2013	0
	SAPATGGVkKPHR	9	2	2	P68432;P84227	K9(Dimet)	0	1.61696e+08	66.03	2.56444e-05	2	1333.77	-2.29725	10.8698	1
	kSTGGkAPR	9	4	3	P68432;P84227;Q5E9F8	K1(Dimet); K6(Acety)	0	4.90665e+06	63.49	1.86473e-05	2	971.563	-0.770616	9.98712	2
	KQLATkAAR	11	3	3	P68432;P84227;Q5E9F8	K6(Acety)	0	2.97228e+08	62.42	2.96708e-05	2	1028.62	-0.720745	12.1607	2
	kSTGGkAPR	4	4	3	P68432;P84227;Q5E9F8	K1(Methy); K6(Acety)	0	2.54796e+06	60.02	3.74272e-05	2	957.547	-1.08494	9.63608	2
	kSAPATGGVK	8	2	2	P68432;P84227	K1(Methy)	0	4.36564e+07	54.4	0.000229284	2	929.541	-0.751142	10.5485	1
	kSAPATGGVK	10	2	2	P68432;P84227	K1(Dimet)	0	5.98959e+07	53.59	0.000195354	2	943.557	0.0850401	10.4314	1
	EIAQDFkTDLR	19	4	3	P68432;P84227;Q5E9F8	K7(Methy)	0	1.04387e+09	52.58	0.000577473	2	1349.71	-0.66798	28.58	1
	STGGkAPR	8	4	3	P68432;P84227;Q5E9F8	K5(Acety)	0	2.58851e+06	51.52	0.000175469	2	815.437	-0.114114	10.366	1
	kSAPATGGVkKPHR	20	2	2	P68432;P84227	K1(Dimet); K10(Dimet)	0	1.42549e+08	51.22	0.000907998	2	1489.89	-6.59323	11.0895	2
	YQKSTELLIR	6	3	3	P68432;P84227;Q5E9F8		0	2.99361e+07	49.96	0.000886124	2	1250.71	1.09235	26.398	1
	KSAPATGGVK	8	2	2	P68432;P84227		0	5.30471e+06	48.78	0.000587345	2	915.526	-0.128779	10.2632	1
	kSAPATGGVkKPHR	29	2	2	P68432;P84227	K1(Methy); K10(Dimet)	0	1.7875e+08	48.11	0.00200806	2	1475.87	-7.05923	10.9916	2
	QLATkAAR	12	3	3	P68432;P84227;Q5E9F8	K5(Acety)	0	1.31574e+08	47.76	0.000658253	2	900.526	-0.214053	14.3239	1
	KSTGGkAPR	4	4	3	P68432;P84227;Q5E9F8	K6(Acety)	0	1.70132e+06	46.8	0.000803334	2	943.53	-1.71508	8.26509	2
	kSAPATGGVkKPHR	24	2	2	P68432;P84227	K1(Methy); K10(Methy)	0	5.19535e+07	45.42	0.00331575	2	1461.86	-4.86204	11.1646	2
	EIAQDFKTDLR	16	4	3	P68432;P84227;Q5E9F8		0	1.41583e+09	45.19	0.00314345	2	1335.69	-0.103433	28.4808	1
	VTImPKDIQLAR	13	3	3	P68432;P84227;Q5E9F8	M4(Oxida)	0	1.00142e+08	44.53	0.00403288	3	1400.79	0.707254	29.75	1
	EIAQDFK	40	5	3	P68432;P84227;Q5E9F8		0	2.63529e+09	43.18	0.0013752	2	850.431	0.619183	21.6698	0
	STELLIRKLPFQR	1	4	3	P68432;P84227;Q5E9F8		0	2.38734e+07	40.9	0.0118673	3	1600.95	0.871856	36.0599	2
	eIAQDFK	13	5	3	P68432;P84227;Q5E9F8	N-Term(Glu->)	0	4.75404e+08	37.33	0.00404065	2	832.421	0.779126	21.2919	0
	STELLIRK	3	4	3	P68432;P84227;Q5E9F8		0	36692121	36.6	0.0123499	2	959.589	0.228583	23.3206	1
	EIAQDFkTDLR	14	4	3	P68432;P84227;Q5E9F8	K7(Dimet)	0	1.42798e+08	35.36	0.0319306	2	1363.72	-2.01481	28.7981	1
	eIAQDFkTDLR	2	4	3	P68432;P84227;Q5E9F8	N-Term(Glu->); K7(Methy)	0	49334727	33.02	0.0515597	3	1331.7	0.0690664	28.5169	1
	RYQKSTELLIR	3	3	3	P68432;P84227;Q5E9F8		0	1.21965e+07	32.5	0.0694773	3	1406.81	1.10259	24.6895	2
	YRPGTVALR	84	5	3	P68432;P84227;Q5E9F8		0	12871724880	31.02	0.0496942	2	1032.6	1.38464	22.8843	0
	kSAPATGGVK	6	2	2	P68432;P84227	K1(Acety)	0	3.73254e+06	30.21	0.0409702	2	957.537	0.131924	12.8103	1
	eIAQDFKTDLR	8	4	3	P68432;P84227;Q5E9F8	N-Term(Glu->)	0	2.42297e+08	27.19	0.188407	2	1317.68	-0.151229	32.8769	1
	kSAPATGGVkKPHR	7	2	2	P68432;P84227	K1(Acety); K10(Dimet)	0	6.34108e+06	22.83	0.858408	3	1503.88	0.12549	11.9492	2
	SAPATGGVkkPHR	3	2	2	P68432;P84227	K9(Methy); K10(Dimet)	0	33101462	19.5	1.13492	2	1347.78	-3.56436	10.9213	1
	RYQkStELLIR	2	3	3	P68432;P84227;Q5E9F8	K4(MethyR0); T6(Phosp)	0	6.17851e+06	17.42	2.59293	2	1503.81	-2.33865	43.3689	2
	RVTImPK	2	3	3	P68432;P84227;Q5E9F8	M5(Oxida)	0	1.88877e+08	16.41	0.937096	2	860.502	0.159988	12.7276	1
	EIAQDFk	1	5	3	P68432;P84227;Q5E9F8	K7(Methy)	0	5.62027e+06	15.53	0.972646	2	864.446	-0.344596	21.3934	0
	RVTIMPK	1	3	3	P68432;P84227;Q5E9F8		0	9.07194e+07	15.4	1.62083	2	844.507	-0.216207	20.7429	1
	kSAPATGGVKKPHR	1	2	2	P68432;P84227	K1(Methy)	0	1.3262e+06	14.06	4.39959	3	1447.85	-0.976478	10.846	2
	kSAPATGGVk	1	2	2	P68432;P84227	K1(Acety); K10(Methy)	0	0	12.06	3.29819	2	971.547	-4.80205	10.6475	1
	kstGGkAPRKQLATk	1	3	3	P68432;P84227;Q5E9F8	K1(Acety); S2(Phosp); T3(Phosp); K6(MethyR0); K15(Dimet)	0	0	11.17	19.2257	3	1817.94	-2.63594	51.5747	4
Q5E9F8	Histone H3.3 OS=Bos taurus GN=H3F3A PE=1 SV=3 - [H33_BOVIN]	2495.39	83.82	3	1	20	406	8.16904e+09	136	15.3185	11.2681
	Sequence	# PSMs	# Proteins	# Protein Groups	Protein Group Accessions	Modifications	ΔCn	Area	IonScore	Exp Value	Charge	MH+ [Da]	ΔM [ppm]	RT [min]	# Missed Cleavages
	FQSAAIGALQEASEAYLVGLFEDTNLcAIHAK	2	2	1	Q5E9F8	C27(Carba)	0	6.68621e+06	119.33	2.2167e-09	3	3437.7	-0.192169	56.1909	0
	STELLIR	109	4	3	P68432;P84227;Q5E9F8		0	9000094154	69.74	6.07821e-06	2	831.494	0.262951	29.2013	0
	kSTGGkAPR	9	4	3	P68432;P84227;Q5E9F8	K1(Dimet); K6(Acety)	0	4.90665e+06	63.49	1.86473e-05	2	971.563	-0.770616	9.98712	2
	KQLATkAAR	11	3	3	P68432;P84227;Q5E9F8	K6(Acety)	0	2.97228e+08	62.42	2.96708e-05	2	1028.62	-0.720745	12.1607	2
	kSTGGkAPR	4	4	3	P68432;P84227;Q5E9F8	K1(Methy); K6(Acety)	0	2.54796e+06	60.02	3.74272e-05	2	957.547	-1.08494	9.63608	2
	EIAQDFkTDLR	19	4	3	P68432;P84227;Q5E9F8	K7(Methy)	0	1.04387e+09	52.58	0.000577473	2	1349.71	-0.66798	28.58	1
	STGGkAPR	8	4	3	P68432;P84227;Q5E9F8	K5(Acety)	0	2.58851e+06	51.52	0.000175469	2	815.437	-0.114114	10.366	1
	YQKSTELLIR	6	3	3	P68432;P84227;Q5E9F8		0	2.99361e+07	49.96	0.000886124	2	1250.71	1.09235	26.398	1
	QLATkAAR	12	3	3	P68432;P84227;Q5E9F8	K5(Acety)	0	1.31574e+08	47.76	0.000658253	2	900.526	-0.214053	14.3239	1
	KSTGGkAPR	4	4	3	P68432;P84227;Q5E9F8	K6(Acety)	0	1.70132e+06	46.8	0.000803334	2	943.53	-1.71508	8.26509	2
	EIAQDFKTDLR	16	4	3	P68432;P84227;Q5E9F8		0	1.41583e+09	45.19	0.00314345	2	1335.69	-0.103433	28.4808	1
	VTImPKDIQLAR	13	3	3	P68432;P84227;Q5E9F8	M4(Oxida)	0	1.00142e+08	44.53	0.00403288	3	1400.79	0.707254	29.75	1
	EIAQDFK	40	5	3	P68432;P84227;Q5E9F8		0	2.63529e+09	43.18	0.0013752	2	850.431	0.619183	21.6698	0
	STELLIRKLPFQR	1	4	3	P68432;P84227;Q5E9F8		0	2.38734e+07	40.9	0.0118673	3	1600.95	0.871856	36.0599	2
	SAPSTGGVkKPHR	5	1	1	Q5E9F8	K9(Dimet)	0	2.1941e+07	38.05	0.0170463	2	1349.77	0.14443	11.078	1
	kSAPSTGGVK	7	1	1	Q5E9F8	K1(Dimet)	0	2.25201e+06	37.8	0.0125631	2	959.55	-1.73591	10.5969	1
	eIAQDFK	13	5	3	P68432;P84227;Q5E9F8	N-Term(Glu->)	0	4.75404e+08	37.33	0.00404065	2	832.421	0.779126	21.2919	0
	STELLIRK	3	4	3	P68432;P84227;Q5E9F8		0	36692121	36.6	0.0123499	2	959.589	0.228583	23.3206	1
	EIAQDFkTDLR	14	4	3	P68432;P84227;Q5E9F8	K7(Dimet)	0	1.42798e+08	35.36	0.0319306	2	1363.72	-2.01481	28.7981	1
	eIAQDFkTDLR	2	4	3	P68432;P84227;Q5E9F8	N-Term(Glu->); K7(Methy)	0	49334727	33.02	0.0515597	3	1331.7	0.0690664	28.5169	1
	RYQKSTELLIR	3	3	3	P68432;P84227;Q5E9F8		0	1.21965e+07	32.5	0.0694773	3	1406.81	1.10259	24.6895	2
	YRPGTVALR	84	5	3	P68432;P84227;Q5E9F8		0	12871724880	31.02	0.0496942	2	1032.6	1.38464	22.8843	0
	eIAQDFKTDLR	8	4	3	P68432;P84227;Q5E9F8	N-Term(Glu->)	0	2.42297e+08	27.19	0.188407	2	1317.68	-0.151229	32.8769	1
	kSAPSTGGVkKPHR	2	1	1	Q5E9F8	K1(Dimet); K10(Dimet)	0	2.39438e+06	25.62	0.34393	2	1505.89	-2.00824	11.3628	2
	RYQkStELLIR	2	3	3	P68432;P84227;Q5E9F8	K4(MethyR0); T6(Phosp)	0	6.17851e+06	17.42	2.59293	2	1503.81	-2.33865	43.3689	2
	RVTImPK	2	3	3	P68432;P84227;Q5E9F8	M5(Oxida)	0	1.88877e+08	16.41	0.937096	2	860.502	0.159988	12.7276	1
	EIAQDFk	1	5	3	P68432;P84227;Q5E9F8	K7(Methy)	0	5.62027e+06	15.53	0.972646	2	864.446	-0.344596	21.3934	0
	RVTIMPK	1	3	3	P68432;P84227;Q5E9F8		0	9.07194e+07	15.4	1.62083	2	844.507	-0.216207	20.7429	1
	kQLAtkAARksAPsTGGVk	1	1	1	Q5E9F8	K1(DimetR0); T5(Phosp); K6(Acety); K10(Acety); S11(Phosp); S14(Phosp); K19(Methy)	0	1.19462e+07	13.84	17.0072	3	2271.1	-9.81945	28.6513	4
	kSAPSTGGVk	1	1	1	Q5E9F8	K1(Dimet); K10(Methy)	0	582602	13.62	2.87429	2	973.567	-0.802379	10.7632	1
	kSAPSTGGVkKPHR	2	1	1	Q5E9F8	K1(Acety); K10(Dimet)	0	2.54752e+06	13.62	7.43664	3	1519.87	-0.301725	11.9953	2
	kstGGkAPRKQLATk	1	3	3	P68432;P84227;Q5E9F8	K1(Acety); S2(Phosp); T3(Phosp); K6(MethyR0); K15(Dimet)	0	0	11.17	19.2257	3	1817.94	-2.63594	51.5747	4
P62803	Histone H4 OS=Bos taurus PE=1 SV=2 - [H4_BOVIN]	2163.21	71.84	1	7	9	120	1.20542e+09	103	11.3604	11.356
	Sequence	# PSMs	# Proteins	# Protein Groups	Protein Group Accessions	Modifications	ΔCn	Area	IonScore	Exp Value	Charge	MH+ [Da]	ΔM [ppm]	RT [min]	# Missed Cleavages
	TVTAmDVVYALK	12	1	1	P62803	M5(Oxida)	0	4.77387e+08	98.22	1.57139e-08	2	1326.7	0.279796	35.522	0
	TVTAMDVVYALK	2	1	1	P62803		0	6.11077e+07	78.3	1.61741e-06	2	1310.7	0.411404	40.689	0
	KTVTAmDVVYALK	4	1	1	P62803	M6(Oxida)	0	1.5818e+07	76.95	2.93874e-06	2	1454.79	0.423461	32.9075	1
	ISGLIYEETR	30	1	1	P62803		0	1176743936	75.57	2.17706e-06	2	1180.62	0.745709	29.3874	0
	DNIQGITKPAIR	19	1	1	P62803		0	1.10863e+09	70.29	9.15294e-06	2	1325.75	0.880284	25.8337	0
	VFLENVIR	15	1	1	P62803		0	1.33089e+09	59.67	5.24368e-05	2	989.578	0.284261	35.6581	0
	TVTAmDVVYALKR	6	1	1	P62803	M5(Oxida)	0	2.68802e+07	52.75	0.000742442	2	1482.8	-0.109831	34.1747	1
	DAVTYTEHAK	29	1	1	P62803		0	6.36392e+08	42.95	0.0019874	2	1134.54	-0.288551	14.4996	0
	GGkGLGkGGAkR	2	1	1	P62803	K3(Acety); K7(Acety); K11(Acety)	0	2.04865e+06	34.59	0.0290714	2	1211.68	-0.473867	19.8693	3
	MsGRGkGGkGLGkGGAkRHR	1	1	1	P62803	S2(Phosp); K6(MethyR0); K9(Dimet); K13(MethyR0); K17(Acety)	0	9.13805e+06	12.62	23.1169	3	2179.22	9.06972	48.2704	6
Q0IIJ2	Histone H1.0 OS=Bos taurus GN=H1F0 PE=2 SV=3 - [H10_BOVIN]	577.791	63.92	1	2	25	74	1.34801e+08	194	20.9382	10.9019
	Sequence	# PSMs	# Proteins	# Protein Groups	Protein Group Accessions	Modifications	ΔCn	Area	IonScore	Exp Value	Charge	MH+ [Da]	ΔM [ppm]	RT [min]	# Missed Cleavages
	YSDmIVAAIQAEK	8	1	1	Q0IIJ2	M4(Oxida)	0	9.49722e+07	94.19	4.69664e-08	2	1454.72	0.266719	32.5266	0
	VGENADSQIK	9	1	1	Q0IIJ2		0	54695753	62.58	3.06403e-05	2	1060.53	-0.649285	12.6715	0
	LVTTGVLK	2	1	1	Q0IIJ2		0	53956484	32.16	0.0273053	2	830.539	5.69863	25.4822	0
	RLVTTGVLK	1	1	1	Q0IIJ2		0	1.90467e+07	27.47	0.114151	2	986.634	-1.55927	24.609	1
	AkSSAkRtGkK	1	1	1	Q0IIJ2	K2(Methy); K6(Dimet); T8(Phosp); K10(MethyR0)	0	77388147	21.81	0.700372	2	1300.76	3.67813	27.5627	4
	kAAskAPsk	22	1	1	Q0IIJ2	K1(Acety); S4(Phosp); K5(Dimet); S8(Phosp); K9(DimetR0)	0	1.38815e+07	21.6	0.356639	2	1151.57	-4.14271	15.821	2
	kAAKPkkAAsKAPSkkPk	6	1	1	Q0IIJ2	K1(MethyR0); K6(Acety); K7(Acety); S10(Phosp); K15(Methy); K16(Methy); K18(Methy)	0	2.11348e+07	21.19	1.67044	2	2087.26	1.85989	46.9222	5
	kkPAAtPkktK	1	1	1	Q0IIJ2	K1(Dimet); K2(Acety); T6(Phosp); K8(Dimet); K9(Methy); T10(Phosp)	0	1.97618e+07	20.74	1.26163	3	1469.8	5.18633	12.6016	3
	AAkPKKAASKAPsK	1	1	1	Q0IIJ2	K3(MethyR0); S13(Phosp)	0	5.73864e+06	19.62	1.51219	2	1479.85	3.78101	40.1666	3
	kAAskAPSkKPkATPVk	2	1	1	Q0IIJ2	K1(MethyR0); S4(Phosp); K5(Dimet); K9(Acety); K12(Methy); K17(Methy)	0	1.318e+07	18.3	3.28954	3	1932.15	1.74073	49.1747	4
	RAKAskk	2	1	1	Q0IIJ2	S5(Phosp); K6(Methy); K7(MethyR0)	0	1.9969e+07	15.28	0.957641	2	899.531	5.41883	26.0842	3
	KEVKkVAtPkkAAkPK	1	1	1	Q0IIJ2	K5(Methy); T8(Phosp); K10(MethyR0); K11(Acety); K14(Acety)	0	0	14.98	7.4863	2	1946.15	-6.39894	42.0772	5
	AAkPKkAAskAPSkkPK	1	1	1	Q0IIJ2	K3(MethyR0); K6(Methy); S9(Phosp); K10(Methy); K14(Acety); K15(Acety)	0	3033335	14.63	8.89284	2	1945.14	-1.37749	48.1227	4
	kTKkPKTVk	1	1	1	Q0IIJ2	K1(Acety); K4(Methy); K9(Acety)	0	1.19633e+06	14.15	2.54984	2	1155.74	-6.33382	61.659	3
	RAkASkKstDHPk	1	1	1	Q0IIJ2	K3(Acety); K6(Dimet); S8(Phosp); T9(Phosp); K13(Dimet)	0	5.76182e+06	13.7	6.81247	2	1711.81	-9.47207	46.7824	4
	KAAKPKkAAsKAPSKkPK	1	1	1	Q0IIJ2	K7(MethyR0); S10(Phosp); K16(Acety)	0	3.90204e+06	13.69	8.83345	3	2003.2	2.25183	47.2418	5
	kPAATPKKTkkPktVk	1	1	1	Q0IIJ2	K1(MethyR0); K10(Methy); K11(Acety); K13(Acety); T14(Phosp); K16(Methy)	0	431376	13.52	8.64808	2	1960.19	2.91512	55.5853	4
	kPkATPVkkAKKKPAAtPKK	1	1	1	Q0IIJ2	K1(MethyR0); K3(Acety); K8(Methy); K9(MethyR0); T17(Phosp)	0	3.57602e+06	13	8.3147	4	2315.44	-9.49056	49.0934	6
	kAASkAPSkkPkATPVk	1	1	1	Q0IIJ2	K1(Acety); K5(Acety); K9(Acety); K10(Acety); K12(Dimet); K17(Methy)	0	1.47429e+06	12.87	11.1081	2	1947.16	-0.467298	46.9588	4
	VAtPKkAAkPkkAAskAPSkkPk	1	1	1	Q0IIJ2	T3(Phosp); K6(Acety); K9(MethyR0); K11(MethyR0); K12(MethyR0); S15(Phosp); K16(MethyR0); K20(Dimet); K21(Dimet); K23(Dimet)	0	6.46627e+06	12.75	7.89956	4	2714.68	6.63792	50.0441	6
	AkKkPAAtPK	1	1	1	Q0IIJ2	K2(DimetR0); K4(Methy); T8(Phosp)	0	2.32043e+08	11.8	4.11282	2	1167.7	-7.7812	34.7366	2
	kVAtPkKAAkPkKAAsK	1	1	1	Q0IIJ2	K1(DimetR0); T4(Phosp); K6(Dimet); K10(Methy); K12(Methy); S16(Phosp)	0	1.3633e+07	11.1	16.4293	2	2002.2	8.76513	47.7408	5
	tENSTSTPAAkPkRAkAskk	1	1	1	Q0IIJ2	T1(Phosp); K11(Acety); K13(Acety); K16(Dimet); S18(Phosp); K19(Dimet); K20(DimetR0)	0	4.17214e+07	11.04	51.8545	3	2435.25	-2.61383	44.519	4
	AAKPkkAASkAPsk	1	1	1	Q0IIJ2	K5(Methy); K6(Methy); K10(Dimet); S13(Phosp); K14(Dimet)	0	0	10.94	11.0981	3	1546.91	1.65451	10.9684	3
	AAKPKkAASkAPsk	1	1	1	Q0IIJ2	K6(Methy); K10(Dimet); S13(Phosp); K14(Dimet)	0	2.0703e+07	10.73	12.227	3	1532.89	-0.818604	11.0521	3
	AAskAPSkkPkATPVkkAk	1	1	1	Q0IIJ2	S3(Phosp); K4(MethyR0); K8(DimetR0); K9(Acety); K11(Acety); K16(Acety); K17(DimetR0); K19(MethyR0)	0	1.77769e+06	10.69	12.3401	4	2244.41	-1.11476	48.4524	5
	TkKEVKKVAtPkKAAkPk	1	1	1	Q0IIJ2	K2(Methy); T10(Phosp); K12(Dimet); K16(Methy); K18(Methy)	0	2.38307e+06	10.59	17.8741	3	2130.3	-5.53544	45.7857	6
	TkkEVkkVAtPKk	1	1	1	Q0IIJ2	K2(Dimet); K3(Methy); K6(Acety); K7(Methy); T10(Phosp); K13(MethyR0)	0	6.93316e+06	10.25	13.4057	3	1680.02	-5.65975	37.8808	5
	AAkPkkAASkAPsKkPk	1	1	1	Q0IIJ2	K3(Dimet); K5(MethyR0); K6(Acety); K10(Acety); S13(Phosp); K15(Methy); K17(Methy)	0	2.55231e+06	10.22	20.5853	3	1973.18	2.29291	52.1024	4
	VATPkKAAKPK	1	1	1	Q0IIJ2	K5(Dimet)	0	1.43625e+07	10.11	4.56783	2	1166.75	-9.42201	44.3963	2
